# Supplementary material for: How downstream sub-basins depend on upstream inflows to avoid scarcity: typology and global analysis of transboundary rivers
Source: Copernicus journal article supplement (doi:10.5194/hess-22-2795-2018), 2018-05-08
Supplement: Supplementary file 1 [file supplementary_hess-2017-537.xlsx]

## Sheet: Water scarcity and dependency
Supplementary information for article:
Munia et al.: How downstream sub-basins depend on upstream inflows to avoid scarcity:typology and global analysis of transboundary rivers.
Sub-basin ID	Basin ID	Country Name	Upstream-Middle stream-Down stream	Local runoff(km3/year)	Natural discharge(km3/year)	Actual discharge(km3/year)	Water Withdrawal (km3/year)	Population	Stress under local runoff	Stress under natural discharge	Stress under actual discharge	Dependency category under stress	Shortage under local runoff (m3/cap/year)	Shortage under natural discharge (m3/cap/year)	Shortage under actual discharge (m3/cap/year)	Dependency category under shoratge
1	5780	Shared zone	Middle stream	3.27732	4.17157	4.16831	0.0137386	4079.7	0.00419203	0.00329339	0.00329597	NNN	803324	1.02252e+06	1.02172e+06	NNN
2	5780	Finland	Upstream	0.260903	0.260903	0.260903	4.58932e-05	58.7357	0.000175901	0.000175901	0.000175901	NNN	4.44199e+06	4.44199e+06	4.44199e+06	NNN
3	5780	Norway	Upstream	0.894256	0.894256	0.894256	0.00325989	1042.16	0.00364537	0.00364537	0.00364537	NNN	858082	858082	858082	NNN
4	6228	Finland	Upstream	1.60629	1.60629	1.60629	0.0132787	6313.03	0.00826669	0.00826669	0.00826669	NNN	254441	254441	254441	NNN
5	6228	Russia	Upstream	0.173332	0.173332	0.173332	0.0585949	17971.5	0.338049	0.338049	0.338049	SSS	9644.87	9644.87	9644.87	NNN
6	6515	United States	Upstream	0.26026	0.26026	0.26026	0	0	0	0	0	NNN	0	0	0	NNN
10	10697	Sweden	Upstream	5.41536	5.41536	5.41536	0.0202394	14135.3	0.00373741	0.00373741	0.00373741	NNN	383109	383109	383109	NNN
11	10697	Finland	Upstream	0.979985	0.979985	0.979985	0.0196141	6595.53	0.0200147	0.0200147	0.0200147	NNN	148583	148583	148583	NNN
12	6736	Finland	Upstream	0.373095	0.373095	0.373095	0.000760095	326.778	0.00203727	0.00203727	0.00203727	NNN	1.14174e+06	1.14174e+06	1.14174e+06	NNN
13	13842	Canada	Middle stream	39.7348	42.4964	42.4961	0.0805197	31486.3	0.00202643	0.00189474	0.00189476	NNN	1.26197e+06	1.34968e+06	1.34967e+06	NNN
21	11301	Finland	Upstream	0.327904	0.327904	0.327904	0.00983736	4327.26	0.0300007	0.0300007	0.0300007	NNN	75776.4	75776.4	75776.4	NNN
25	13842	United States	Upstream	2.76161	2.76161	2.76161	0.00026095	502.729	9.44918e-05	9.44918e-05	9.44918e-05	NNN	5.49324e+06	5.49324e+06	5.49324e+06	NNN
27	17102	Russia	Upstream	1.63373	1.63373	1.63373	0.0243299	9316.39	0.0148923	0.0148923	0.0148923	NNN	175361	175361	175361	NNN
32	17102	Finland	Middle stream	9.44031	11.074	11.0497	0.281734	549950	0.0298437	0.0254409	0.0254969	NNN	17165.8	20136.4	20092.2	NNN
36	18792	Norway	Upstream	2.12521	2.12521	2.12521	0.0424155	25610.4	0.0199583	0.0199583	0.0199583	NNN	82982.2	82982.2	82982.2	NNN
38	16948	Canada	Upstream	1.6272	1.6272	1.6272	0	0	0	0	0	NNN	0	0	0	NNN
40	17387	Canada	Upstream	14.6327	14.6327	14.6327	0.00373927	654.329	0.000255541	0.000255541	0.000255541	NNN	2.2363e+07	2.2363e+07	2.2363e+07	NNN
43	18251	Canada	Upstream	12.6512	12.6512	12.6512	0.00135314	46.5881	0.000106958	0.000106958	0.000106958	NNN	2.71555e+08	2.71555e+08	2.71555e+08	NNN
44	17542	Estonia	Upstream	2.36314	2.36314	2.36314	0.658665	249906	0.278724	0.278724	0.278724	SSS	9456.15	9456.15	9456.15	NNN
45	17542	Russia	Upstream	4.76791	4.76791	4.76791	0.367135	554748	0.0770012	0.0770012	0.0770012	NNN	8594.72	8594.72	8594.72	NNN
46	18662	Canada	Upstream	5.54042	5.54042	5.54042	2.18172e-06	117.943	3.93783e-07	3.93783e-07	3.93783e-07	NNN	4.69753e+07	4.69753e+07	4.69753e+07	NNN
49	19230	Estonia	Middle stream	0.578812	1.21662	1.20269	0.096479	52838.5	0.166684	0.0793011	0.0802194	NNN	10954.4	23025.2	22761.6	NNN
52	19230	Latvia	Upstream	0.637804	0.637804	0.637804	0.0139269	80128.6	0.0218357	0.0218357	0.0218357	NNN	7959.76	7959.76	7959.76	NNN
53	19492	Canada	Upstream	22.2928	22.2928	22.2928	0.0135389	1068.92	0.000607322	0.000607322	0.000607322	NNN	2.08555e+07	2.08555e+07	2.08555e+07	NNN
54	19646	Lithuania	Upstream	1.39884	1.39884	1.39884	0.355454	305721	0.254107	0.254107	0.254107	SSS	4575.55	4575.55	4575.55	NNN
57	19230	Latvia	Upstream	0.193647	0.193647	0.193647	0.00670103	30614.8	0.0346044	0.0346044	0.0346044	NNN	6325.27	6325.27	6325.27	NNN
58	20903	Lithuania	Downstream	8.86245	16.5975	15.8035	5.36176	2.55996e+06	0.604998	0.323046	0.339276	SSS	3461.95	6483.52	6173.36	NNN
59	19230	Belarus	Middle stream	5.10037	7.89125	7.65704	0.507736	1.20376e+06	0.099549	0.0643417	0.0663097	NNN	4237.04	6555.52	6360.95	NNN
60	19230	Russia	Upstream	2.59724	2.59724	2.59724	0.227508	182757	0.0875959	0.0875959	0.0875959	NNN	14211.5	14211.5	14211.5	NNN
64	20874	Ireland	Upstream	1.71242	1.71242	1.71242	0.0178685	45709.9	0.0104346	0.0104346	0.0104346	NNN	37462.9	37462.9	37462.9	NNN
66	20903	Belarus	Upstream	7.73509	7.73509	7.73509	0.79399	2.20691e+06	0.102648	0.102648	0.102648	NNN	3504.95	3504.95	3504.95	NNN
67	28427	Russia	Upstream	5.18007	5.18007	5.18007	1.01084	1.12513e+06	0.19514	0.19514	0.19514	NNN	4603.99	4603.99	4603.99	NNN
68	21307	United Kingdom	Upstream	2.93023	2.93023	2.93023	0.0286118	96408.3	0.00976435	0.00976435	0.00976435	NNN	30393.9	30393.9	30393.9	NNN
69	21341	Poland	Upstream	1.04662	1.04662	1.04662	0.18099	313205	0.172928	0.172928	0.172928	NNN	3341.65	3341.65	3341.65	NNN
79	9584	Russia	Upstream	0.372645	0.372645	0.372645	0.0455644	29315	0.122273	0.122273	0.122273	NNN	12711.8	12711.8	12711.8	NNN
82	22353	Russia	Upstream	2.11327	2.11327	2.11327	0.145821	128219	0.0690024	0.0690024	0.0690024	NNN	16481.8	16481.8	16481.8	NNN
86	22231	Shared zone	Middle stream	2.0729	35.141	27.7168	0.528883	525063	0.255141	0.0150503	0.0190817	SNN	3947.92	66927.1	52787.5	NNN
88	22816	Russia	Upstream	1.49169	1.49169	1.49169	0.125616	72279.4	0.0842104	0.0842104	0.0842104	NNN	20637.9	20637.9	20637.9	NNN
93	21789	Belarus	Upstream	0.138096	0.138096	0.138096	0.0194707	39694.7	0.140995	0.140995	0.140995	NNN	3478.95	3478.95	3478.95	NNN
100	22944	China	Upstream	120.199	120.199	120.199	32.6328	6.43009e+07	0.271491	0.271491	0.271491	SSS	1869.31	1869.31	1869.31	NNN
102	22231	Poland	Downstream	27.919	33.0681	32.596	6.95217	1.32716e+07	0.249013	0.210238	0.213283	SSS	2103.67	2491.65	2456.08	NNN
103	21789	Shared zone	Middle stream	0.842488	4.56588	3.47992	0.334098	750505	0.396561	0.0731727	0.0960074	SNN	1122.56	6083.75	4636.77	NNN
104	21789	Belarus	Upstream	0.466473	0.466473	0.466473	0.124234	168873	0.266326	0.266326	0.266326	SSS	2762.28	2762.28	2762.28	NNN
105	28427	Belarus	Middle stream	18.183	34.8265	32.0644	2.79396	5.64133e+06	0.153658	0.0802253	0.0871359	NNN	3223.17	6173.45	5683.84	NNN
107	28427	Russia	Upstream	14.4087	14.4087	14.4087	2.50533	2.77558e+06	0.173876	0.173876	0.173876	NNN	5191.25	5191.25	5191.25	NNN
110	9584	Russia	Middle stream	4.84651	7.84505	7.71923	0.723382	714921	0.149259	0.0922087	0.0937117	NNN	6779.08	10973.3	10797.3	NNN
111	22944	Russia	Middle stream	176.522	182.445	182.436	2.31529	1.86516e+06	0.0131161	0.0126904	0.0126909	NNN	94642	97817.1	97812.8	NNN
115	24055	Netherlands	Downstream	3.36349	18.4047	13.6168	2.20039	4.60009e+06	0.654199	0.119556	0.161594	SNN	731.179	4000.95	2960.11	SNN
116	23596	Germany	Downstream	49.3485	106.567	100.746	17.2334	3.30159e+07	0.349219	0.161715	0.171059	SNN	1494.69	3227.74	3051.42	NNN
118	21789	Poland	Upstream	0.673602	0.673602	0.673602	0.0366068	150654	0.0543449	0.0543449	0.0543449	NNN	4471.19	4471.19	4471.19	NNN
119	28427	Ukraine	Upstream	11.4634	11.4634	11.4634	1.7512	2.99018e+06	0.152764	0.152764	0.152764	NNN	3833.69	3833.69	3833.69	NNN
124	28466	Russia	Downstream	14.2521	17.4238	16.6415	3.27924	2.59795e+06	0.230088	0.188204	0.197051	SNN	5485.9	6706.75	6405.64	NNN
128	5822	Mongolia	Middle stream	39.6763	48.096	48.0875	0.537897	1.68909e+06	0.0135571	0.0111838	0.0111858	NNN	23489.8	28474.6	28469.6	NNN
132	24055	Netherlands	Middle stream	0.632108	13.0152	9.58668	0.286402	691869	0.45309	0.0220052	0.029875	SNN	913.624	18811.7	13856.2	SNN
133	24055	Germany	Middle stream	2.02602	15.0412	11.3263	1.07303	2.03666e+06	0.529623	0.0713391	0.0947377	SNN	994.778	7385.25	5561.22	SNN
138	28466	Kazakhstan	Middle stream	1.04386	3.17172	2.4788	0.0893631	90836.1	0.0856083	0.028175	0.0360509	NNN	11491.7	34916.9	27288.8	NNN
139	28466	Russia	Middle stream	0.723662	2.12786	1.48288	0.0479413	67777.4	0.0662482	0.0225303	0.0323298	NNN	10677	31394.8	21878.7	NNN
146	24506	France	Upstream	4.11736	4.11736	4.11736	1.76652	2.78015e+06	0.429041	0.429041	0.429041	SSS	1480.98	1480.98	1480.98	NNN
147	24055	Belgium	Middle stream	6.67019	12.3831	12.0413	3.08674	3.14107e+06	0.462766	0.24927	0.256346	SSS	2123.54	3942.31	3833.5	NNN
148	22219	Czech Rep.	Upstream	22.5258	22.5258	22.5258	2.37422	6.09161e+06	0.1054	0.1054	0.1054	NNN	3697.85	3697.85	3697.85	NNN
151	28022	Russia	Upstream	4.05291	4.05291	4.05291	0.734172	991936	0.181147	0.181147	0.181147	NNN	4085.86	4085.86	4085.86	NNN
153	26765	Russia	Upstream	1.41427	1.41427	1.41427	0.275847	108791	0.195045	0.195045	0.195045	NNN	12999.9	12999.9	12999.9	NNN
154	28466	Kazakhstan	Upstream	1.40419	1.40419	1.40419	0.644972	409724	0.459318	0.459318	0.459318	SSS	3427.17	3427.17	3427.17	NNN
155	9584	Kazakhstan	Middle stream	42.0395	55.5189	52.5953	8.49993	3.96101e+06	0.202189	0.1531	0.16161	SNN	10613.3	14016.3	13278.3	NNN
158	9584	Kazakhstan	Middle stream	2.6259	2.99855	2.95298	0.0802564	61590.3	0.0305634	0.0267651	0.0271781	NNN	42635	48685.4	47945.6	NNN
159	25559	Russia	Middle stream	0.817397	2.28297	2.27628	0.0104803	15794.5	0.0128216	0.00459067	0.00460415	NNN	51752	144542	144119	NNN
166	22231	Czech Rep.	Upstream	5.1491	5.1491	5.1491	0.472002	1.08757e+06	0.0916669	0.0916669	0.0916669	NNN	4734.51	4734.51	4734.51	NNN
167	21789	Ukraine	Upstream	2.58332	2.58332	2.58332	0.925124	1.02656e+06	0.358114	0.358114	0.358114	SSS	2516.49	2516.49	2516.49	NNN
176	5822	Russia	Middle stream	7.23777	8.41972	8.41964	0.00844153	19932.2	0.00116632	0.00100259	0.0010026	NNN	363119	422417	422413	NNN
183	19156	Canada	Upstream	6.30642	6.30642	6.30642	0.0341197	23170.7	0.00541031	0.00541031	0.00541031	NNN	272173	272173	272173	NNN
184	24055	France	Upstream	5.71291	5.71291	5.71291	0.341791	522076	0.0598279	0.0598279	0.0598279	NNN	10942.7	10942.7	10942.7	NNN
185	23596	Luxembourg	Upstream	1.35458	1.35458	1.35458	0.285126	262778	0.21049	0.21049	0.21049	SSS	5154.86	5154.86	5154.86	NNN
187	21789	Ukraine	Upstream	2.1775	2.1775	2.1775	0.0911533	258125	0.0418615	0.0418615	0.0418615	NNN	8435.84	8435.84	8435.84	NNN
188	25559	Mongolia	Upstream	1.46557	1.46557	1.46557	0.00668285	23302.7	0.0045599	0.0045599	0.0045599	NNN	62892.7	62892.7	62892.7	NNN
191	22944	Russia	Upstream	0.760109	0.760109	0.760109	0.00390337	5067.94	0.00513527	0.00513527	0.00513527	NNN	149984	149984	149984	NNN
193	25605	Mongolia	Upstream	2.39893	2.39893	2.39893	0.0189541	26274.2	0.00790106	0.00790106	0.00790106	NNN	91303.6	91303.6	91303.6	NNN
198	28646	Canada	Middle stream	32.0021	40.9853	40.8112	0.628655	448663	0.0196442	0.0153385	0.015404	NNN	71327.7	91349.8	90961.9	NNN
202	28646	Canada	Upstream	6.09635	6.09635	6.09635	0.139784	54271.2	0.0229292	0.0229292	0.0229292	NNN	112331	112331	112331	NNN
204	40485	Canada	Middle stream	0.871441	1.42913	1.42261	0.0971887	18175.7	0.111527	0.0680057	0.0683173	NNN	47945.3	78628.3	78269.8	NNN
211	19156	Canada	Middle stream	1.03195	1.05699	1.05626	0.194378	65479.8	0.188359	0.183898	0.184023	NNN	15759.9	16142.2	16131.2	NNN
213	19156	Shared zone	Middle stream	4.26358	14.5742	14.4984	0.0466717	39859.5	0.0109466	0.00320236	0.0032191	NNN	106965	365639	363737	NNN
217	23596	France	Upstream	9.06066	9.06066	9.06066	1.5439	2.66436e+06	0.170396	0.170396	0.170396	NNN	3400.69	3400.69	3400.69	NNN
218	29646	Czech Rep.	Upstream	7.27729	7.27729	7.27729	0.784869	2.04037e+06	0.107852	0.107852	0.107852	NNN	3566.65	3566.65	3566.65	NNN
224	5822	Mongolia	Upstream	1.18195	1.18195	1.18195	7.87952e-05	1693	6.66654e-05	6.66654e-05	6.66654e-05	NNN	698140	698140	698140	NNN
225	22944	Mongolia	Middle stream	5.16194	5.92205	5.91815	0.00412237	25568.5	0.000798609	0.000696106	0.000696565	NNN	201887	231616	231463	NNN
230	28646	United States	Middle stream	2.88685	8.98319	8.84341	0.0342847	30789.6	0.0118762	0.00381654	0.00387687	NNN	93760.4	291760	287220	NNN
232	19156	United States	Middle stream	16.8511	17.908	17.7129	0.590585	681112	0.0350473	0.0329787	0.033342	NNN	24740.5	26292.4	26005.9	NNN
233	40485	United States	Upstream	0.557685	0.557685	0.557685	0.006517	6717.82	0.0116858	0.0116858	0.0116858	NNN	83015.8	83015.8	83015.8	NNN
235	19156	United States	Upstream	0.0250363	0.0250363	0.0250363	0.000723481	980.899	0.0288973	0.0288973	0.0288973	NNN	25523.8	25523.8	25523.8	NNN
240	28332	Canada	Upstream	86.6761	86.6761	86.6761	7.85782	6.83345e+06	0.0906572	0.0906572	0.0906572	NNN	12684.1	12684.1	12684.1	NNN
243	23596	Shared zone	Middle stream	12.4158	46.8031	44.9331	2.12235	5.11777e+06	0.170939	0.0453464	0.0472335	NNN	2426.02	9145.22	8779.84	NNN
244	29646	Germany	Middle stream	40.448	56.016	55.5018	6.55491	1.04788e+07	0.162058	0.117019	0.118103	NNN	3860	5345.67	5296.6	NNN
245	29646	Austria	Middle stream	19.637	75.653	68.5838	1.64307	4.31235e+06	0.0836723	0.0217185	0.0239571	NNN	4553.66	17543.3	15904	NNN
246	29646	Slovakia	Upstream	3.93472	3.93472	3.93472	0.361242	1.20792e+06	0.0918088	0.0918088	0.0918088	NNN	3257.42	3257.42	3257.42	NNN
249	29646	Ukraine	Middle stream	7.15938	9.83063	9.75834	0.452198	1.05032e+06	0.0631617	0.0459989	0.0463397	NNN	6816.38	9359.65	9290.82	NNN
250	28838	Ukraine	Upstream	17.3303	17.3303	17.3303	2.63115	4.30173e+06	0.151824	0.151824	0.151824	NNN	4028.67	4028.67	4028.67	NNN
253	28022	Ukraine	Middle stream	15.0612	19.1141	18.3799	7.45897	6.27678e+06	0.495246	0.390235	0.405822	SSS	2399.51	3045.2	2928.24	NNN
254	9584	Kazakhstan	Upstream	0.438777	0.438777	0.438777	0.000182953	1714.02	0.000416962	0.000416962	0.000416962	NNN	255993	255993	255993	NNN
255	26466	Mongolia	Middle stream	3.82269	4.81415	4.80531	0.056914	146346	0.0148885	0.0118222	0.011844	NNN	26121	32895.7	32835.3	NNN
258	19156	United States	Upstream	4.00418	4.00418	4.00418	0.0416724	44335.1	0.0104072	0.0104072	0.0104072	NNN	90316.2	90316.2	90316.2	NNN
264	23596	France	Upstream	2.40289	2.40289	2.40289	0.372842	685870	0.155164	0.155164	0.155164	NNN	3503.42	3503.42	3503.42	NNN
265	23596	Germany	Upstream	1.66605	1.66605	1.66605	0.0669433	225401	0.0401808	0.0401808	0.0401808	NNN	7391.51	7391.51	7391.51	NNN
267	29646	Slovakia	Upstream	12.9115	12.9115	12.9115	0.691156	3.01781e+06	0.0535302	0.0535302	0.0535302	NNN	4278.45	4278.45	4278.45	NNN
272	29646	Ukraine	Middle stream	3.69397	4.10914	4.01465	1.25099	1.06963e+06	0.338657	0.304441	0.311606	SSS	3453.5	3841.64	3753.3	NNN
273	29646	Moldova	Upstream	0.733662	0.733662	0.733662	0.401924	437163	0.547833	0.547833	0.547833	SSS	1678.24	1678.24	1678.24	NNN
275	28021	Ukraine	Upstream	1.63517	1.63517	1.63517	1.79206	1.4122e+06	1.09594	1.09594	1.09594	SSS	1157.89	1157.89	1157.89	NNN
277	28872	Kazakhstan	Upstream	0.0227116	0.0227116	0.0227116	0.000301398	3460.67	0.0132706	0.0132706	0.0132706	NNN	6562.79	6562.79	6562.79	NNN
284	22944	Shared zone	Middle stream	12.9072	315.55	280.594	1.00942	1.53315e+06	0.0782063	0.00319892	0.00359744	NNN	8418.73	205819	183018	NNN
289	29574	Canada	Upstream	7.52309	7.52309	7.52309	0.093148	36002.5	0.0123816	0.0123816	0.0123816	NNN	208960	208960	208960	NNN
293	29646	Austria	Middle stream	14.1063	15.568	15.5418	0.48804	1.07252e+06	0.0345974	0.031349	0.0314017	NNN	13152.5	14515.3	14490.9	NNN
295	29646	Shared zone	Middle stream	6.42784	105.357	94.8819	1.1506	2.51626e+06	0.179002	0.0109209	0.0121266	NNN	2554.52	41870.6	37707.5	NNN
296	29646	Romania	Upstream	21.7526	21.7526	21.7526	3.31338	4.73186e+06	0.152321	0.152321	0.152321	NNN	4597.05	4597.05	4597.05	NNN
297	29646	Romania	Upstream	2.67125	2.67125	2.67125	0.0722905	150913	0.0270624	0.0270624	0.0270624	NNN	17700.6	17700.6	17700.6	NNN
301	9584	China	Middle stream	5.19552	5.6343	5.63411	2.07416	413074	0.39922	0.368131	0.368143	SSS	12577.7	13639.9	13639.5	NNN
308	28332	United States	Upstream	131.744	131.744	131.744	30.003	2.44379e+07	0.227737	0.227737	0.227737	SSS	5390.97	5390.97	5390.97	NNN
314	23596	Switzerland	Upstream	30.3183	30.3183	30.3183	1.43014	5.23253e+06	0.0471709	0.0471709	0.0471709	NNN	5794.2	5794.2	5794.2	NNN
317	29646	Austria	Upstream	5.59693	5.59693	5.59693	0.320746	651946	0.0573076	0.0573076	0.0573076	NNN	8584.95	8584.95	8584.95	NNN
318	29646	Austria	Upstream	1.27362	1.27362	1.27362	0.0653491	303457	0.0513099	0.0513099	0.0513099	NNN	4197.02	4197.02	4197.02	NNN
319	29646	Hungary	Middle stream	1.81409	3.0877	3.02235	0.221902	503610	0.122321	0.0718663	0.0734202	NNN	3602.16	6131.14	6001.37	NNN
322	29646	Romania	Middle stream	13.6251	283.184	228.171	4.78998	6.54458e+06	0.351555	0.0169147	0.0209929	SNN	2081.89	43270	34864.1	NNN
324	26466	China	Upstream	0.991462	0.991462	0.991462	0.00884749	51685.2	0.00892369	0.00892369	0.00892369	NNN	19182.7	19182.7	19182.7	NNN
335	29574	United States	Upstream	6.97032	6.97032	6.97032	0.0160111	28807	0.00229704	0.00229704	0.00229704	NNN	241966	241966	241966	NNN
339	29646	Switzerland	Upstream	1.46172	1.46172	1.46172	0.0261727	26589	0.0179054	0.0179054	0.0179054	NNN	54974.8	54974.8	54974.8	NNN
340	29646	Austria	Upstream	8.84644	8.84644	8.84644	0.286471	840767	0.0323826	0.0323826	0.0323826	NNN	10521.9	10521.9	10521.9	NNN
342	29247	Moldova	Upstream	0.216303	0.216303	0.216303	0.252951	366720	1.16943	1.16943	1.16943	SSS	589.831	589.831	589.831	SSS
343	28838	Moldova	Downstream	3.25838	20.5886	17.9575	2.38405	2.13419e+06	0.731667	0.115794	0.132761	SNN	1526.75	9647.03	8414.18	NNN
344	28872	Russia	Middle stream	0.0148735	0.0375851	0.0372837	0.0237002	27887.6	1.59345	0.630574	0.635672	SSS	533.337	1347.74	1336.93	SNN
349	29574	Shared zone	Middle stream	11.6626	26.156	26.0469	0.172778	152087	0.0148147	0.00660567	0.00663335	NNN	76684	171981	171263	NNN
350	31160	Switzerland	Upstream	7.39482	7.39482	7.39482	0.604658	1.28194e+06	0.0817678	0.0817678	0.0817678	NNN	5768.47	5768.47	5768.47	NNN
351	29646	Slovenia	Upstream	15.3456	15.3456	15.3456	0.323875	1.31728e+06	0.0211054	0.0211054	0.0211054	NNN	11649.5	11649.5	11649.5	NNN
352	29646	Slovenia	Middle stream	0.978072	9.82451	9.53804	0.0304804	223100	0.0311637	0.00310248	0.00319566	NNN	4384.01	44036.4	42752.4	NNN
353	29646	Hungary	Middle stream	6.2474	111.605	99.9787	3.92359	4.45924e+06	0.628036	0.0351561	0.0392443	SNN	1401	25027.7	22420.5	NNN
354	29646	Hungary	Middle stream	12.0553	47.5732	43.3741	3.86632	4.3645e+06	0.320716	0.081271	0.089139	SNN	2762.12	10900	9937.92	NNN
356	29646	Moldova	Upstream	0.415167	0.415167	0.415167	0.0944883	168595	0.227591	0.227591	0.227591	SSS	2462.51	2462.51	2462.51	NNN
357	28937	China	Upstream	1.01541	1.01541	1.01541	5.09464	293523	5.01731	5.01731	5.01731	SSS	3459.4	3459.4	3459.4	NNN
358	28118	Mongolia	Upstream	0.385572	0.385572	0.385572	0.00317484	7704.93	0.00823411	0.00823411	0.00823411	NNN	50042.3	50042.3	50042.3	NNN
364	29646	Croatia	Middle stream	6.29296	21.6386	21.3147	1.12173	1.56848e+06	0.178251	0.0518393	0.052627	NNN	4012.15	13795.9	13589.4	NNN
365	29646	Romania	Upstream	3.51161	3.51161	3.51161	0.849612	858043	0.241944	0.241944	0.241944	SSS	4092.57	4092.57	4092.57	NNN
372	28332	Shared zone	Middle stream	21.3995	239.82	201.959	20.9795	1.01108e+07	0.980378	0.0874805	0.10388	SNN	2116.5	23719.3	19974.6	NNN
374	29646	Shared zone	Middle stream	7.06967	180.504	160.123	1.68364	3.08815e+06	0.23815	0.00932743	0.0105147	SNN	2289.29	58450.6	51850.6	NNN
376	29646	Romania	Upstream	13.5922	13.5922	13.5922	3.57937	4.42549e+06	0.26334	0.26334	0.26334	SSS	3071.35	3071.35	3071.35	NNN
378	29687	Uzbekistan	Upstream	0.237222	0.237222	0.237222	0.013394	3290.65	0.0564618	0.0564618	0.0564618	NNN	72089.6	72089.6	72089.6	NNN
379	29702	Uzbekistan	Middle stream	10.4151	117.287	25.4127	23.0807	7.39792e+06	2.21608	0.196788	0.908237	SNS	1407.84	15854.1	3435.11	NNN
385	28332	United States	Upstream	11.0698	11.0698	11.0698	0.349895	556237	0.0316081	0.0316081	0.0316081	NNN	19901.2	19901.2	19901.2	NNN
387	29646	Bosnia and Herz.	Middle stream	16.7893	24.7699	24.4957	2.47451	2.65473e+06	0.147386	0.0999	0.101018	NNN	6324.3	9330.48	9227.19	NNN
392	29646	Serbia	Middle stream	9.57964	242.083	210.457	7.43407	6.45838e+06	0.776028	0.0307088	0.0353234	SNN	1483.29	37483.5	32586.7	NNN
398	30550	Mongolia	Upstream	0.126306	0.126306	0.126306	3.60925e-05	615.848	0.000285755	0.000285755	0.000285755	NNN	205092	205092	205092	NNN
399	30932	Mongolia	Upstream	0.293225	0.293225	0.293225	2.83043e-05	1116.95	9.65278e-05	9.65278e-05	9.65278e-05	NNN	262522	262522	262522	NNN
400	30202	China	Upstream	4.15767e-06	4.15767e-06	4.15767e-06	0.000137529	2557.94	33.0782	33.0782	33.0782	SSS	1.6254	1.6254	1.6254	SSS
418	29646	Shared zone	Middle stream	7.56296	269.559	220.599	6.05309	3.9144e+06	0.800361	0.0224556	0.0274394	SNN	1932.08	68863.3	56355.7	NNN
422	30586	Mongolia	Upstream	2.45339e-07	2.45339e-07	2.45339e-07	8.15742e-05	1522.58	332.495	332.495	332.495	SSS	0.161134	0.161134	0.161134	SSS
428	29646	Bulgaria	Upstream	6.32084	6.32084	6.32084	6.40181	2.97618e+06	1.01281	1.01281	1.01281	SSS	2123.81	2123.81	2123.81	NNN
432	29327	China	Middle stream	8.15449	8.72057	8.71663	5.41544	2.10379e+06	0.664105	0.620997	0.621277	SSS	3876.1	4145.17	4143.3	NNN
434	30966	Mongolia	Upstream	3.67153e-07	3.67153e-07	3.67153e-07	0.00963869	61392.8	26252.5	26252.5	26252.5	SSS	0.0059804	0.0059804	0.0059804	SSS
435	31383	China	Upstream	1.3645	1.3645	1.3645	0.0741267	135757	0.0543252	0.0543252	0.0543252	NNN	10051.1	10051.1	10051.1	NNN
446	29646	Montenegro	Upstream	7.98057	7.98057	7.98057	0.274192	211522	0.0343574	0.0343574	0.0343574	NNN	37729.3	37729.3	37729.3	NNN
448	29646	N. Cyprus	Upstream	0.913787	0.913787	0.913787	0.64497	543230	0.70582	0.70582	0.70582	SSS	1682.14	1682.14	1682.14	NNN
460	29714	Shared zone	Middle stream	2.01662	11.0563	8.16424	2.8416	255272	1.40909	0.257011	0.348054	SSS	7899.88	43312	31982.5	NNN
461	29714	Kazakhstan	Upstream	0.536867	0.536867	0.536867	0.00189051	14698.4	0.00352137	0.00352137	0.00352137	NNN	36525.5	36525.5	36525.5	NNN
463	32045	Mongolia	Upstream	0.0466448	0.0466448	0.0466448	0	0	0	0	0	NNN	0	0	0	NNN
465	32108	China	Upstream	4.01319	4.01319	4.01319	0.320189	913189	0.0797843	0.0797843	0.0797843	NNN	4394.69	4394.69	4394.69	NNN
471	32322	Kazakhstan	Upstream	0.208492	0.208492	0.208492	1.75914e-05	4897.06	8.43743e-05	8.43743e-05	8.43743e-05	NNN	42574.9	42574.9	42574.9	NNN
473	30502	Kyrgyzstan	Upstream	3.72976	3.72976	3.72976	1.3866	151439	0.371768	0.371768	0.371768	SSS	24628.8	24628.8	24628.8	NNN
474	29714	Kyrgyzstan	Upstream	0.700868	0.700868	0.700868	0.723291	66982.3	1.03199	1.03199	1.03199	SSS	10463.5	10463.5	10463.5	NNN
475	29714	Kyrgyzstan	Upstream	8.50286	8.50286	8.50286	2.89021	2.02189e+06	0.339911	0.339911	0.339911	SSS	4205.41	4205.41	4205.41	NNN
478	29327	Kazakhstan	Upstream	0.566073	0.566073	0.566073	0.00393715	24002.1	0.0069552	0.0069552	0.0069552	NNN	23584.3	23584.3	23584.3	NNN
479	32049	Mongolia	Upstream	0.0961396	0.0961396	0.0961396	1.52611e-05	431.386	0.000158739	0.000158739	0.000158739	NNN	222862	222862	222862	NNN
485	32263	Montenegro	Upstream	9.06198	9.06198	9.06198	0.0965511	364060	0.0106545	0.0106545	0.0106545	NNN	24891.5	24891.5	24891.5	NNN
486	32263	N. Cyprus	Upstream	2.42321	2.42321	2.42321	0.475569	1.09557e+06	0.196256	0.196256	0.196256	NNN	2211.83	2211.83	2211.83	NNN
487	32991	Bulgaria	Upstream	6.7356	6.7356	6.7356	5.18285	2.26702e+06	0.769471	0.769471	0.769471	SSS	2971.12	2971.12	2971.12	NNN
488	31228	Turkmenistan	Upstream	0.224828	0.224828	0.224828	5.65125e-06	393.471	2.51359e-05	2.51359e-05	2.51359e-05	NNN	571395	571395	571395	NNN
490	32322	Uzbekistan	Middle stream	0.365109	0.573601	0.573583	9.0119e-06	65.9467	2.46828e-05	1.57111e-05	1.57116e-05	NNN	5.53642e+06	8.69794e+06	8.69768e+06	NNN
495	33477	Kyrgyzstan	Upstream	4.20885	4.20885	4.20885	0.0194688	11669.3	0.00462567	0.00462567	0.00462567	NNN	360677	360677	360677	NNN
497	33146	Mongolia	Upstream	0.0698688	0.0698688	0.0698688	1.51921e-05	786.03	0.000217437	0.000217437	0.000217437	NNN	88888.2	88888.2	88888.2	NNN
498	32059	China	Upstream	0.140316	0.140316	0.140316	0.000803385	15428.9	0.00572555	0.00572555	0.00572555	NNN	9094.33	9094.33	9094.33	NNN
499	31335	China	Upstream	0.0678516	0.0678516	0.0678516	0.000515081	7712.09	0.00759128	0.00759128	0.00759128	NNN	8798.09	8798.09	8798.09	NNN
500	31708	China	Upstream	0.0296285	0.0296285	0.0296285	0.000440513	10726	0.0148679	0.0148679	0.0148679	NNN	2762.31	2762.31	2762.31	NNN
502	32108	Dem. Rep. Korea	Upstream	2.7175	2.7175	2.7175	0.0729927	351273	0.0268603	0.0268603	0.0268603	NNN	7736.14	7736.14	7736.14	NNN
506	32986	Bulgaria	Upstream	1.80138	1.80138	1.80138	0.833643	399824	0.462779	0.462779	0.462779	SSS	4505.44	4505.44	4505.44	NNN
507	32988	Bulgaria	Upstream	0.424768	0.424768	0.424768	0.109646	72320.8	0.258131	0.258131	0.258131	SSS	5873.39	5873.39	5873.39	NNN
509	34094	Georgia	Middle stream	14.9199	16.3621	16.3174	2.45433	2.22089e+06	0.164501	0.150001	0.150411	NNN	6717.97	7367.37	7347.25	NNN
511	32305	Russia	Upstream	3.52378	3.52378	3.52378	0.0956452	255890	0.0271428	0.0271428	0.0271428	NNN	13770.7	13770.7	13770.7	NNN
515	29702	Kyrgyzstan	Upstream	2.03399	2.03399	2.03399	0.0747997	13498.7	0.0367748	0.0367748	0.0367748	NNN	150681	150681	150681	NNN
526	32581	Spain	Upstream	17.6439	17.6439	17.6439	3.49783	2.84714e+06	0.198246	0.198246	0.198246	NNN	6197.06	6197.06	6197.06	NNN
527	32263	Macedonia	Upstream	0.811859	0.811859	0.811859	0.0365221	164959	0.0449857	0.0449857	0.0449857	NNN	4921.57	4921.57	4921.57	NNN
528	32984	Macedonia	Upstream	6.18102	6.18102	6.18102	1.12475	2.16762e+06	0.181969	0.181969	0.181969	NNN	2851.52	2851.52	2851.52	NNN
529	32291	Turkey	Upstream	8.45703	8.45703	8.45703	0.298168	777617	0.0352567	0.0352567	0.0352567	NNN	10875.6	10875.6	10875.6	NNN
530	34094	Turkey	Upstream	1.44224	1.44224	1.44224	0.0446742	339913	0.0309756	0.0309756	0.0309756	NNN	4242.96	4242.96	4242.96	NNN
531	34094	Armenia	Upstream	4.40406	4.40406	4.40406	0.622758	766430	0.141405	0.141405	0.141405	NNN	5746.2	5746.2	5746.2	NNN
533	29702	Shared zone	Middle stream	0.21181	72.2772	14.0619	0.704458	310783	3.3259	0.00974661	0.0500969	SNN	681.535	232565	45246.7	SNN
534	29702	Uzbekistan	Upstream	0.206126	0.206126	0.206126	0.0102791	27419.7	0.0498678	0.0498678	0.0498678	NNN	7517.46	7517.46	7517.46	NNN
535	29702	Kyrgyzstan	Upstream	24.9267	24.9267	24.9267	5.07996	1.9744e+06	0.203796	0.203796	0.203796	SSS	12624.9	12624.9	12624.9	NNN
539	33895	China	Upstream	8.1559	8.1559	8.1559	0.553718	2.2401e+06	0.0678918	0.0678918	0.0678918	NNN	3640.86	3640.86	3640.86	NNN
540	33895	Dem. Rep. Korea	Upstream	7.70237	7.70237	7.70237	0.266288	1.15452e+06	0.0345722	0.0345722	0.0345722	NNN	6671.52	6671.52	6671.52	NNN
543	34094	Turkey	Upstream	3.28835	3.28835	3.28835	0.620633	1.2362e+06	0.188737	0.188737	0.188737	NNN	2660.04	2660.04	2660.04	NNN
545	29702	Turkmenistan	Middle stream	0.0507982	71.8593	14.4594	0.805165	148419	15.8503	0.0112047	0.0556844	SNN	342.263	484166	97423.2	SNN
548	29702	Uzbekistan	Middle stream	4.21057	29.1373	24.0573	20.8643	7.75011e+06	4.95522	0.71607	0.867276	SSS	543.292	3759.59	3104.13	SNN
558	34094	Armenia	Upstream	3.14801	3.14801	3.14801	0.989676	816010	0.314382	0.314382	0.314382	SSS	3857.81	3857.81	3857.81	NNN
560	29702	Tajikistan	Middle stream	2.14044	32.5611	6.47378	6.79285	2.51389e+06	3.17358	0.208618	1.04929	SSS	851.445	12952.5	2575.2	SNN
564	34348	Spain	Upstream	9.95787	9.95787	9.95787	2.95996	7.09373e+06	0.297248	0.297248	0.297248	SSS	1403.76	1403.76	1403.76	NNN
565	34094	Turkey	Upstream	0.66234	0.66234	0.66234	0.318467	262969	0.480822	0.480822	0.480822	SSS	2518.7	2518.7	2518.7	NNN
567	34094	Azerbaijan	Upstream	1.44715	1.44715	1.44715	0.106459	151285	0.0735645	0.0735645	0.0735645	NNN	9565.71	9565.71	9565.71	NNN
568	34094	Shared zone	Middle stream	2.48419	14.056	8.33247	3.45805	2.15617e+06	1.39202	0.246019	0.415009	SSS	1152.13	6518.95	3864.47	NNN
570	29702	Kyrgyzstan	Upstream	1.28344	1.28344	1.28344	0.143083	151676	0.111484	0.111484	0.111484	NNN	8461.73	8461.73	8461.73	NNN
575	29702	Kyrgyzstan	Upstream	1.43614	1.43614	1.43614	0.0890272	47747.5	0.0619906	0.0619906	0.0619906	NNN	30077.8	30077.8	30077.8	NNN
577	34094	Iran	Middle stream	3.02595	3.68829	3.36982	4.15231	1.69736e+06	1.37224	1.12581	1.23221	SSS	1782.74	2172.96	1985.33	NNN
582	29702	Uzbekistan	Middle stream	4.67283	71.8085	33.104	18.6954	5.71304e+06	4.00087	0.26035	0.564747	SSS	817.923	12569.2	5794.46	SNN
583	29702	Tajikistan	Upstream	3.28701	3.28701	3.28701	0.0872734	292813	0.026551	0.026551	0.026551	NNN	11225.6	11225.6	11225.6	NNN
584	35354	Spain	Upstream	3.55063	3.55063	3.55063	3.56733	1.63291e+06	1.0047	1.0047	1.0047	SSS	2174.42	2174.42	2174.42	NNN
586	29702	Turkmenistan	Middle stream	0.876332	63.8486	29.0872	3.85576	629946	4.39989	0.0603891	0.132559	SNN	1391.12	101356	46174.1	NNN
587	29702	Uzbekistan	Upstream	4.86607	4.86607	4.86607	6.87899	2.49277e+06	1.41366	1.41366	1.41366	SSS	1952.08	1952.08	1952.08	NNN
588	29702	Tajikistan	Upstream	2.42429	2.42429	2.42429	1.17149	1.30672e+06	0.483229	0.483229	0.483229	SSS	1855.24	1855.24	1855.24	NNN
589	29702	Tajikistan	Middle stream	20.2893	21.7255	21.6365	5.99476	2.61299e+06	0.295464	0.275932	0.277068	SSS	7764.8	8314.41	8280.34	NNN
590	35244	Dem. Rep. Korea	Upstream	6.81563	6.81563	6.81563	0.237592	723881	0.0348598	0.0348598	0.0348598	NNN	9415.41	9415.41	9415.41	NNN
597	40294	Turkey	Upstream	16.7873	16.7873	16.7873	2.92197	2.62244e+06	0.174058	0.174058	0.174058	NNN	6401.43	6401.43	6401.43	NNN
598	35444	Turkmenistan	Middle stream	1.81303	4.93465	3.87611	0.264187	159087	0.145716	0.0535373	0.0681579	NNN	11396.5	31018.5	24364.7	NNN
599	35444	Iran	Upstream	3.12161	3.12161	3.12161	1.05854	987778	0.3391	0.3391	0.3391	SSS	3160.24	3160.24	3160.24	NNN
600	29702	Uzbekistan	Middle stream	2.57054	4.99484	3.82335	4.09948	1.27457e+06	1.59479	0.820743	1.07222	SSS	2016.8	3918.85	2999.73	NNN
606	29702	Afghanistan	Upstream	18.1572	18.1572	18.1572	4.60229	4.70334e+06	0.253469	0.253469	0.253469	SSS	3860.5	3860.5	3860.5	NNN
608	40294	Turkey	Upstream	27.513	27.513	27.513	5.9646	6.85885e+06	0.216792	0.216792	0.216792	SSS	4011.31	4011.31	4011.31	NNN
618	34103	Iran	Upstream	2.7256	2.7256	2.7256	4.25127	3.05311e+06	1.55976	1.55976	1.55976	SSS	892.728	892.728	892.728	SSS
619	29702	Afghanistan	Upstream	5.64861	5.64861	5.64861	6.36867	4.85417e+06	1.12748	1.12748	1.12748	SSS	1163.66	1163.66	1163.66	NNN
620	29702	Shared zone	Downstream	7.58009	52.4576	36.5006	8.28975	2.37345e+06	1.09362	0.158027	0.227113	SNS	3193.7	22101.8	15378.7	NNN
623	36079	Syria	Middle stream	4.92892	6.07244	5.91823	2.38027	3.87146e+06	0.48292	0.39198	0.402193	SSS	1273.14	1568.51	1528.68	NNN
624	40294	Iran	Upstream	48.3264	48.3264	48.3264	28.2095	1.11996e+07	0.583729	0.583729	0.583729	SSS	4315.02	4315.02	4315.02	NNN
631	33477	Pakistan	Upstream	0.179179	0.179179	0.179179	0.000285272	4325.7	0.00159211	0.00159211	0.00159211	NNN	41421.9	41421.9	41421.9	NNN
632	35374	Algeria	Upstream	1.86134	1.86134	1.86134	0.17831	851807	0.0957962	0.0957962	0.0957962	NNN	2185.17	2185.17	2185.17	NNN
637	34103	Afghanistan	Middle stream	6.91266	7.38238	6.91266	3.75508	3.00726e+06	0.543219	0.508655	0.543219	SSS	2298.65	2454.85	2298.65	NNN
638	43904	Pakistan	Upstream	2.82191	2.82191	2.82191	0.0453734	376606	0.016079	0.016079	0.016079	NNN	7493	7493	7493	NNN
640	34103	Iran	Upstream	0.469718	0.469718	0.469718	3.0894	335150	6.57714	6.57714	6.57714	SSS	1401.52	1401.52	1401.52	NNN
643	43904	N. Cyprus	Upstream	0.0347045	0.0347045	0.0347045	0.000391584	10073.9	0.0112834	0.0112834	0.0112834	NNN	3444.98	3444.98	3444.98	NNN
644	43904	China	Upstream	25.2894	25.2894	25.2894	0.00284072	52330.6	0.000112328	0.000112328	0.000112328	NNN	483262	483262	483262	NNN
645	40294	Syria	Middle stream	3.46083	31.0047	25.0304	8.99473	4.11829e+06	2.59901	0.290109	0.359352	SSS	840.356	7528.53	6077.86	SNN
648	43904	India	Middle stream	83.2703	112.384	112.379	17.2714	2.84714e+07	0.207414	0.153682	0.153689	SNN	2924.69	3947.25	3947.08	NNN
649	37360	Tunisia	Middle stream	3.35738	7.57376	7.54754	0.148733	1.21558e+06	0.0443003	0.0196379	0.0197062	NNN	2761.96	6230.56	6208.99	NNN
650	36079	Lebanon	Upstream	1.14352	1.14352	1.14352	0.154203	249479	0.134849	0.134849	0.134849	NNN	4583.63	4583.63	4583.63	NNN
652	37727	Iran	Upstream	1.3026	1.3026	1.3026	1.10054	292033	0.844878	0.844878	0.844878	SSS	4460.45	4460.45	4460.45	NNN
653	43904	Afghanistan	Middle stream	20.4594	23.2813	23.2359	2.79471	1.10617e+07	0.136598	0.120041	0.120275	NNN	1849.57	2104.68	2100.58	NNN
664	37763	China	Upstream	0.470547	0.470547	0.470547	0.000211318	3977.61	0.000449089	0.000449089	0.000449089	NNN	118299	118299	118299	NNN
665	38801	United States	Upstream	42.4335	42.4335	42.4335	12.1382	6.85356e+06	0.286051	0.286051	0.286051	SSS	6191.46	6191.46	6191.46	NNN
666	40294	Iraq	Upstream	0.0308587	0.0308587	0.0308587	0.00967022	1511.14	0.313371	0.313371	0.313371	SSS	20420.8	20420.8	20420.8	NNN
672	43904	Antigua and Barb.	Middle stream	1.29989	3.78963	3.78804	0.000226983	6444.33	0.000174618	5.98959e-05	5.99211e-05	NNN	201710	588057	587809	NNN
675	37360	Algeria	Middle stream	0.878196	4.21638	4.19627	0.00611205	57371.2	0.00695978	0.0014496	0.00145654	NNN	15307.3	73493	73142.5	NNN
677	39270	Israel	Middle stream	1.04837	1.80417	1.07857	0.684766	1.22464e+06	0.653175	0.379547	0.634886	SSS	856.059	1473.22	880.719	SNS
678	39270	Syria	Upstream	0.755803	0.755803	0.755803	0.725604	2.8733e+06	0.960043	0.960043	0.960043	SSS	263.044	263.044	263.044	SSS
679	37989	Jordan	Upstream	0.20644	0.20644	0.20644	0.00216556	5479.65	0.01049	0.01049	0.01049	NNN	37673.9	37673.9	37673.9	NNN
682	38356	Iran	Upstream	0.33193	0.33193	0.33193	0.0682089	56840.6	0.205492	0.205492	0.205492	SSS	5839.67	5839.67	5839.67	NNN
686	43904	China	Upstream	2.48975	2.48975	2.48975	0.00159326	18885	0.000639928	0.000639928	0.000639928	NNN	131837	131837	131837	NNN
687	38172	Mexico	Upstream	0.0342277	0.0342277	0.0342277	0.12016	632086	3.51061	3.51061	3.51061	SSS	54.1503	54.1503	54.1503	SSS
688	39133	United States	Upstream	0.467546	0.467546	0.467546	0.066794	48969.8	0.142861	0.142861	0.142861	NNN	9547.64	9547.64	9547.64	NNN
690	42615	United States	Upstream	14.5572	14.5572	14.5572	2.65687	1.56136e+06	0.182512	0.182512	0.182512	NNN	9323.41	9323.41	9323.41	NNN
691	42061	Morocco	Upstream	1.16883	1.16883	1.16883	0.0146154	73301.1	0.0125043	0.0125043	0.0125043	NNN	15945.6	15945.6	15945.6	NNN
695	39322	Iran	Upstream	0.614606	0.614606	0.614606	0.115458	426370	0.187856	0.187856	0.187856	NNN	1441.49	1441.49	1441.49	NNN
699	39121	United States	Upstream	0.0452199	0.0452199	0.0452199	0.0128686	7318.31	0.284579	0.284579	0.284579	SSS	6179.01	6179.01	6179.01	NNN
700	41387	United States	Upstream	0.000410578	0.000410578	0.000410578	0.0276329	3093.6	67.3025	67.3025	67.3025	SSS	132.719	132.719	132.719	SSS
702	37360	Tunisia	Middle stream	0.564664	1.92257	1.91606	0.00856137	42198.7	0.0151619	0.00445308	0.00446822	NNN	13381.1	45560	45405.6	NNN
703	39270	Palestine	Upstream	0.676545	0.676545	0.676545	0.0598151	2.33802e+06	0.0884126	0.0884126	0.0884126	NNN	289.366	289.366	289.366	SSS
704	39270	Jordan	Middle stream	1.84124	4.32195	2.85177	0.388484	4.91672e+06	0.210991	0.0898862	0.136226	SNN	374.485	879.031	580.014	SSS
705	39609	Jordan	Upstream	0.28976	0.28976	0.28976	0.0283522	335993	0.0978469	0.0978469	0.0978469	NNN	862.399	862.399	862.399	SSS
706	38322	Saudi Arabia	Upstream	0.35575	0.35575	0.35575	0.0187095	226117	0.0525917	0.0525917	0.0525917	NNN	1573.3	1573.3	1573.3	NNN
709	39322	Afghanistan	Downstream	21.5526	22.3723	22.2559	12.6928	7.58054e+06	0.58892	0.567344	0.57031	SSS	2843.15	2951.27	2935.92	NNN
712	40505	Morocco	Upstream	1.58872	1.58872	1.58872	0.11739	761354	0.0738895	0.0738895	0.0738895	NNN	2086.7	2086.7	2086.7	NNN
714	40246	Egypt	Upstream	0.441798	0.441798	0.441798	0.0272422	10809.6	0.0616621	0.0616621	0.0616621	NNN	40871	40871	40871	NNN
720	37360	Libya	Upstream	1.35791	1.35791	1.35791	0.00651392	30571.8	0.00479702	0.00479702	0.00479702	NNN	44417	44417	44417	NNN
727	40294	Saudi Arabia	Upstream	1.55885	1.55885	1.55885	0.0212571	131744	0.0136364	0.0136364	0.0136364	NNN	11832.4	11832.4	11832.4	NNN
734	40802	Morocco	Upstream	4.58769	4.58769	4.58769	0.196676	1.10551e+06	0.0428703	0.0428703	0.0428703	NNN	4149.84	4149.84	4149.84	NNN
739	37360	Libya	Upstream	1.41561	1.41561	1.41561	0.00503302	32919.1	0.00355538	0.00355538	0.00355538	NNN	43002.6	43002.6	43002.6	NNN
746	40639	Afghanistan	Upstream	0.124413	0.124413	0.124413	0.00758732	8403.08	0.0609851	0.0609851	0.0609851	NNN	14805.6	14805.6	14805.6	NNN
747	44515	China	Upstream	32.6366	32.6366	32.6366	0.0179313	124997	0.000549424	0.000549424	0.000549424	NNN	261100	261100	261100	NNN
755	40583	Jordan	Upstream	0.0458011	0.0458011	0.0458011	0.0188292	122410	0.411109	0.411109	0.411109	SSS	374.162	374.162	374.162	SSS
758	44515	India	Upstream	17.0491	17.0491	17.0491	0.159965	1.4644e+06	0.0093826	0.0093826	0.0093826	NNN	11642.4	11642.4	11642.4	NNN
760	42615	Mexico	Upstream	18.9726	18.9726	18.9726	4.46129	6.88043e+06	0.235143	0.235143	0.235143	SSS	2757.48	2757.48	2757.48	NNN
764	40565	Libya	Middle stream	0.130297	0.134846	0.134824	0.0116267	528.729	0.0892326	0.0862221	0.0862363	NNN	246434	255039	254997	NNN
767	39322	Pakistan	Upstream	0.205036	0.205036	0.205036	0.000898659	3945.58	0.00438294	0.00438294	0.00438294	NNN	51965.9	51965.9	51965.9	NNN
770	44515	China	Upstream	111.074	111.074	111.074	0.661303	1.45686e+06	0.00595372	0.00595372	0.00595372	NNN	76241.8	76241.8	76241.8	NNN
774	40802	Algeria	Middle stream	1.15659	5.74428	5.5476	0.0349102	213526	0.0301838	0.00607738	0.00629283	NNN	5416.61	26902.1	25981	NNN
778	40293	Saudi Arabia	Upstream	6.93204	6.93204	6.93204	13.521	2.41053e+06	1.9505	1.9505	1.9505	SSS	2875.73	2875.73	2875.73	NNN
780	41261	Iran	Upstream	1.2731	1.2731	1.2731	0.386873	364390	0.303882	0.303882	0.303882	SSS	3493.79	3493.79	3493.79	NNN
781	43905	India	Upstream	10.2619	10.2619	10.2619	82.4267	5.92486e+07	8.03229	8.03229	8.03229	SSS	173.201	173.201	173.201	SSS
782	44515	Nepal	Middle stream	159.124	208.81	208.632	10.782	3.46012e+07	0.0677583	0.0516354	0.0516794	NNN	4598.8	6034.75	6029.61	NNN
803	44515	China	Upstream	5.84761	5.84761	5.84761	0.00246589	16894.2	0.000421692	0.000421692	0.000421692	NNN	346131	346131	346131	NNN
804	44515	China	Upstream	1.85528	1.85528	1.85528	0.000290684	5195.11	0.000156679	0.000156679	0.000156679	NNN	357120	357120	357120	NNN
806	41437	Morocco	Upstream	0.385138	0.385138	0.385138	0.000505565	15405.2	0.00131268	0.00131268	0.00131268	NNN	25000.6	25000.6	25000.6	NNN
807	41483	Algeria	Middle stream	0.127111	0.147222	0.147216	0.00762023	82614.1	0.0599494	0.0517601	0.0517621	NNN	1538.61	1782.05	1781.98	NNN
817	44515	India	Middle stream	4.19935	6.05463	6.05433	0.00515038	44127.8	0.00122647	0.000850651	0.000850692	NNN	95163.3	137207	137200	NNN
818	47944	China	Upstream	28.4328	28.4328	28.4328	0.630274	1.46516e+06	0.0221671	0.0221671	0.0221671	NNN	19406	19406	19406	NNN
819	41732	Morocco	Upstream	0.150076	0.150076	0.150076	7.2953e-06	1396.67	4.86107e-05	4.86107e-05	4.86107e-05	NNN	107453	107453	107453	NNN
824	44515	Bhutan	Middle stream	33.7433	45.6455	45.6376	0.0354125	799307	0.00104947	0.000775817	0.000775951	NNN	42215.6	57106.3	57096.4	NNN
830	41732	W. Sahara	Middle stream	0.256345	0.406421	0.406414	1.73891e-05	1917.95	6.78348e-05	4.27859e-05	4.27867e-05	NNN	133656	211904	211900	NNN
831	42045	W. Sahara	Upstream	0.00499197	0.00499197	0.00499197	5.31849e-06	498.293	0.00106541	0.00106541	0.00106541	NNN	10018.2	10018.2	10018.2	NNN
832	43769	Algeria	Upstream	1.19041	1.19041	1.19041	0.000147305	236281	0.000123743	0.000123743	0.000123743	NNN	5038.12	5038.12	5038.12	NNN
833	43053	Iran	Upstream	0.555339	0.555339	0.555339	0.0027363	41220.6	0.00492726	0.00492726	0.00492726	NNN	13472.4	13472.4	13472.4	NNN
841	44515	India	Downstream	749.689	1115.22	1103.55	260.127	4.84381e+08	0.34698	0.233252	0.235718	SSS	1547.73	2302.36	2278.28	NNN
844	43769	W. Sahara	Upstream	0.175243	0.175243	0.175243	2.69054e-05	2896.27	0.000153532	0.000153532	0.000153532	NNN	60506.5	60506.5	60506.5	NNN
848	43773	Algeria	Upstream	0.0579361	0.0579361	0.0579361	1.70241e-05	71.9679	0.000293843	0.000293843	0.000293843	NNN	805027	805027	805027	NNN
855	41732	Mauritania	Upstream	0.0164051	0.0164051	0.0164051	4.64675e-05	299.672	0.00283251	0.00283251	0.00283251	NNN	54743.4	54743.4	54743.4	NNN
860	43773	Mauritania	Middle stream	0.0478968	0.105833	0.105816	6.06351e-06	1.52894	0.000126595	5.72933e-05	5.73025e-05	NNN	3.13268e+07	6.92197e+07	6.92086e+07	NNN
870	43773	Algeria	Middle stream	0.0277336	0.133567	0.133543	5.64073e-06	233.279	0.00020339	4.22316e-05	4.22389e-05	NNN	118886	572560	572461	NNN
871	44346	Algeria	Upstream	0.0597357	0.0597357	0.0597357	4.32587e-05	216.576	0.000724169	0.000724169	0.000724169	NNN	275819	275819	275819	NNN
885	47944	India	Upstream	16.4018	16.4018	16.4018	0.277858	2.54967e+06	0.0169407	0.0169407	0.0169407	NNN	6432.92	6432.92	6432.92	NNN
889	47738	China	Upstream	71.7059	71.7059	71.7059	0.70624	2.93475e+06	0.00984912	0.00984912	0.00984912	NNN	24433.4	24433.4	24433.4	NNN
890	42621	W. Sahara	Upstream	0.10256	0.10256	0.10256	0	1541.49	0	0	0	NNN	66532.8	66532.8	66532.8	NNN
891	44055	Mali	Upstream	0.0206144	0.0206144	0.0206144	8.71343e-06	692.686	0.000422686	0.000422686	0.000422686	NNN	29760.1	29760.1	29760.1	NNN
892	44348	Algeria	Upstream	0.0637912	0.0637912	0.0637912	3.00925e-05	135.06	0.000471734	0.000471734	0.000471734	NNN	472316	472316	472316	NNN
893	40565	Egypt	Upstream	0.00454935	0.00454935	0.00454935	2.21201e-05	83.0231	0.00486227	0.00486227	0.00486227	NNN	54796.1	54796.1	54796.1	NNN
894	43609	Saudi Arabia	Downstream	18.7439	19.8379	19.7643	5.75826	7.85755e+06	0.307207	0.290266	0.291346	SSS	2385.46	2524.69	2515.33	NNN
895	43614	Oman	Upstream	0.228011	0.228011	0.228011	0.112847	214598	0.494918	0.494918	0.494918	SSS	1062.5	1062.5	1062.5	NNN
903	45887	China	Upstream	42.0425	42.0425	42.0425	2.78315	7.1083e+06	0.0661986	0.0661986	0.0661986	NNN	5914.56	5914.56	5914.56	NNN
904	44329	W. Sahara	Upstream	0.0953356	0.0953356	0.0953356	0.000122312	1595.02	0.00128297	0.00128297	0.00128297	NNN	59770.9	59770.9	59770.9	NNN
905	44346	Mauritania	Upstream	0.0385616	0.0385616	0.0385616	5.51974e-05	822.104	0.00143141	0.00143141	0.00143141	NNN	46905.9	46905.9	46905.9	NNN
906	44636	Algeria	Upstream	0.100514	0.100514	0.100514	1.11452e-05	82.8673	0.000110882	0.000110882	0.000110882	NNN	1.21296e+06	1.21296e+06	1.21296e+06	NNN
907	48842	Algeria	Upstream	0.239554	0.239554	0.239554	0.00354117	186873	0.0147824	0.0147824	0.0147824	NNN	1281.91	1281.91	1281.91	NNN
908	41483	Niger	Upstream	0.020111	0.020111	0.020111	5.80868e-06	129.833	0.00028883	0.00028883	0.00028883	NNN	154899	154899	154899	NNN
909	42388	Niger	Upstream	0.0447276	0.0447276	0.0447276	3.97563e-07	0	8.88855e-06	8.88855e-06	8.88855e-06	NNN	0	0	0	NNN
910	39906	Chad	Upstream	0.13258	0.13258	0.13258	1.63285e-05	6916.38	0.000123159	0.000123159	0.000123159	NNN	19169	19169	19169	NNN
912	45035	United Arab Emirates	Upstream	0.148879	0.148879	0.148879	0.347598	15590.2	2.33476	2.33476	2.33476	SSS	9549.55	9549.55	9549.55	NNN
923	45492	Chad	Upstream	0.107354	0.107354	0.107354	7.99275e-06	653.697	7.4452e-05	7.4452e-05	7.4452e-05	NNN	164227	164227	164227	NNN
928	45035	Saudi Arabia	Middle stream	0.451556	0.601191	0.452307	0.0222873	2516.91	0.0493566	0.037072	0.0492747	NNN	179409	238861	179708	NNN
929	45859	Shared zone	Upstream	16.2913	16.2913	16.2913	0.0133005	294367	0.000816417	0.000816417	0.000816417	NNN	55343.3	55343.3	55343.3	NNN
933	44560	Vietnam	Upstream	3.44047	3.44047	3.44047	0.0577462	543183	0.0167844	0.0167844	0.0167844	NNN	6333.91	6333.91	6333.91	NNN
940	45859	India	Middle stream	5.74682	22.0381	22.0248	0.00922176	92794.3	0.00160467	0.000418447	0.000418699	NNN	61930.7	237494	237350	NNN
941	50068	China	Upstream	2.4177	2.4177	2.4177	0.0726227	273605	0.030038	0.030038	0.030038	NNN	8836.46	8836.46	8836.46	NNN
942	50068	China	Upstream	69.4772	69.4772	69.4772	1.83669	6.60437e+06	0.0264358	0.0264358	0.0264358	NNN	10519.9	10519.9	10519.9	NNN
945	45936	Morocco	Upstream	0.144707	0.144707	0.144707	5.97538e-06	120.056	4.12928e-05	4.12928e-05	4.12928e-05	NNN	1.20533e+06	1.20533e+06	1.20533e+06	NNN
947	45193	Mauritania	Upstream	1.23527	1.23527	1.23527	3.11431e-05	1348.23	2.52117e-05	2.52117e-05	2.52117e-05	NNN	916217	916217	916217	NNN
948	45206	Algeria	Upstream	0.127348	0.127348	0.127348	0.00207927	81759.3	0.0163275	0.0163275	0.0163275	NNN	1557.6	1557.6	1557.6	NNN
951	43005	Sudan	Upstream	0.0551332	0.0551332	0.0551332	0.000747923	4516.87	0.0135657	0.0135657	0.0135657	NNN	12206.1	12206.1	12206.1	NNN
956	38935	Sudan	Downstream	13.9324	409.79	406.585	12.1428	1.79774e+07	0.871553	0.0296318	0.0298654	SNN	774.992	22794.7	22616.4	SNN
963	44427	Sudan	Upstream	0.222727	0.222727	0.222727	0.00127141	51226.3	0.00570837	0.00570837	0.00570837	NNN	4347.91	4347.91	4347.91	NNN
968	45936	W. Sahara	Middle stream	0.44564	0.590348	0.590342	3.54862e-05	17853.4	7.96297e-05	6.01106e-05	6.01112e-05	NNN	24961	33066.3	33066	NNN
970	46728	Algeria	Upstream	0.33532	0.33532	0.33532	0.0245697	470598	0.0732724	0.0732724	0.0732724	NNN	712.54	712.54	712.54	SSS
973	50068	Myanmar	Middle stream	3.87255	6.29025	6.21762	0.0615476	399423	0.0158933	0.00978461	0.00989889	NNN	9695.36	15748.3	15566.5	NNN
974	46132	Vietnam	Upstream	1.51307	1.51307	1.51307	0.0640163	458035	0.0423088	0.0423088	0.0423088	NNN	3303.4	3303.4	3303.4	NNN
977	45035	Oman	Upstream	0.000754685	0.000754685	0.000754685	4.01642e-06	207.538	0.00532198	0.00532198	0.00532198	NNN	3636.38	3636.38	3636.38	NNN
979	50068	Lao PDR	Upstream	0.76017	0.76017	0.76017	0.000879372	12290.2	0.00115681	0.00115681	0.00115681	NNN	61851.6	61851.6	61851.6	NNN
980	46132	Lao PDR	Middle stream	3.92818	5.44125	5.37724	0.0259425	487220	0.00660421	0.00476775	0.00482451	NNN	8062.44	11168	11036.6	NNN
984	46760	Libya	Upstream	0.00833723	0.00833723	0.00833723	0	0	0	0	0	NNN	0	0	0	NNN
985	47238	Libya	Upstream	0.0275751	0.0275751	0.0275751	2.45554e-07	1.90298	8.90495e-06	8.90495e-06	8.90495e-06	NNN	1.44904e+07	1.44904e+07	1.44904e+07	NNN
986	50068	Thailand	Upstream	5.0323	5.0323	5.0323	0.598031	1.14267e+06	0.118838	0.118838	0.118838	NNN	4403.99	4403.99	4403.99	NNN
987	50068	Shared zone	Middle stream	6.24376	87.8037	85.2339	0.0754485	501806	0.0120838	0.000859287	0.000885194	NNN	12442.6	174976	169854	NNN
988	46962	Algeria	Upstream	0.0374674	0.0374674	0.0374674	0.000165286	12769.7	0.00441146	0.00441146	0.00441146	NNN	2934.09	2934.09	2934.09	NNN
989	46727	Algeria	Upstream	0.0294034	0.0294034	0.0294034	0	0	0	0	0	NNN	0	0	0	NNN
992	50068	Thailand	Upstream	2.30474	2.30474	2.30474	0.413422	692448	0.179379	0.179379	0.179379	NNN	3328.4	3328.4	3328.4	NNN
995	46725	Algeria	Upstream	0.0902984	0.0902984	0.0902984	0	0	0	0	0	NNN	0	0	0	NNN
997	46726	Algeria	Upstream	0.0973675	0.0973675	0.0973675	0	0	0	0	0	NNN	0	0	0	NNN
998	45818	Oman	Upstream	0.0378228	0.0378228	0.0378228	1.7682e-06	500.472	4.67495e-05	4.67495e-05	4.67495e-05	NNN	75574.4	75574.4	75574.4	NNN
1000	47738	Thailand	Upstream	0.436906	0.436906	0.436906	0.0231426	38980.6	0.0529692	0.0529692	0.0529692	NNN	11208.3	11208.3	11208.3	NNN
1001	46617	Lao PDR	Upstream	4.22714	4.22714	4.22714	0.00757106	134693	0.00179106	0.00179106	0.00179106	NNN	31383.5	31383.5	31383.5	NNN
1002	46949	Mauritania	Upstream	1.45595	1.45595	1.45595	6.50286e-06	54.2218	4.46641e-06	4.46641e-06	4.46641e-06	NNN	2.68517e+07	2.68517e+07	2.68517e+07	NNN
1003	47434	Niger	Middle stream	2.55841	3.04846	3.04845	4.69314e-05	1835.83	1.8344e-05	1.53951e-05	1.53952e-05	NNN	1.3936e+06	1.66054e+06	1.66053e+06	NNN
1004	43609	Yemen	Upstream	1.09396	1.09396	1.09396	0.0735291	374576	0.0672139	0.0672139	0.0672139	NNN	2920.52	2920.52	2920.52	NNN
1006	45818	Yemen	Upstream	0.314133	0.314133	0.314133	0.000422562	12098.1	0.00134517	0.00134517	0.00134517	NNN	25965.5	25965.5	25965.5	NNN
1008	47738	Myanmar	Middle stream	30.4731	102.616	101.887	0.558565	2.77261e+06	0.0183298	0.00544326	0.00548223	NNN	10990.8	37010.6	36747.5	NNN
1009	50068	Lao PDR	Middle stream	112.2	202.309	199.25	0.517433	3.62154e+06	0.00461169	0.00255764	0.0025969	NNN	30981.4	55862.6	55018.1	NNN
1012	46656	Mexico	Upstream	0.344676	0.344676	0.344676	0.00297953	7008.35	0.00864444	0.00864444	0.00864444	NNN	49180.8	49180.8	49180.8	NNN
1020	46656	Guatemala	Upstream	0.814292	0.814292	0.814292	3.75177e-05	2970.55	4.6074e-05	4.6074e-05	4.6074e-05	NNN	274122	274122	274122	NNN
1021	47814	Mali	Upstream	0.173974	0.173974	0.173974	0.000225613	12944.4	0.00129682	0.00129682	0.00129682	NNN	13440.1	13440.1	13440.1	NNN
1022	46073	Yemen	Upstream	0.10715	0.10715	0.10715	0.000430586	6015.8	0.00401853	0.00401853	0.00401853	NNN	17811.4	17811.4	17811.4	NNN
1023	47738	Thailand	Middle stream	8.28851	110.904	109.617	0.24814	521315	0.0299379	0.00223742	0.00226371	NNN	15899.2	212740	210269	NNN
1024	50068	Thailand	Upstream	83.2242	83.2242	83.2242	6.98244	1.90166e+07	0.0838991	0.0838991	0.0838991	NNN	4376.39	4376.39	4376.39	NNN
1027	46401	Shared zone	Middle stream	9.34207	73.6054	73.4871	0.0191409	149564	0.00204889	0.000260047	0.000260466	NNN	62462.1	492134	491343	NNN
1028	46401	Guatemala	Upstream	4.19614	4.19614	4.19614	0.000692057	38409	0.000164927	0.000164927	0.000164927	NNN	109249	109249	109249	NNN
1029	52220	Niger	Upstream	0.331881	0.331881	0.331881	0.00864609	49141.8	0.0260518	0.0260518	0.0260518	NNN	6753.54	6753.54	6753.54	NNN
1038	46401	Mexico	Middle stream	23.1692	33.192	33.1887	0.0771526	584018	0.00332996	0.00232443	0.00232467	NNN	39672.1	56833.9	56828.1	NNN
1039	46401	Guatemala	Upstream	31.0713	31.0713	31.0713	0.0377526	1.48782e+06	0.00121503	0.00121503	0.00121503	NNN	20883.8	20883.8	20883.8	NNN
1040	47580	Mauritania	Upstream	1.09499	1.09499	1.09499	0.0949786	530308	0.0867394	0.0867394	0.0867394	NNN	2064.82	2064.82	2064.82	NNN
1043	47238	Chad	Middle stream	1.77878	1.97825	1.97643	0.000396303	144669	0.000222795	0.00020033	0.000200515	NNN	12295.5	13674.4	13661.8	NNN
1044	46793	Eritrea	Upstream	2.35585	2.35585	2.35585	0.102003	2.32425e+06	0.0432978	0.0432978	0.0432978	NNN	1013.59	1013.59	1013.59	NNN
1053	47580	Senegal	Middle stream	0.92795	5.53949	5.52742	0.0441981	750049	0.0476298	0.00797873	0.00799615	NNN	1237.19	7385.5	7369.41	NNN
1059	50068	Vietnam	Upstream	10.9977	10.9977	10.9977	0.0142945	108751	0.00129977	0.00129977	0.00129977	NNN	101128	101128	101128	NNN
1060	46400	Guatemala	Upstream	5.55177	5.55177	5.55177	0.0444876	1.03397e+06	0.00801322	0.00801322	0.00801322	NNN	5369.37	5369.37	5369.37	NNN
1061	46401	Guatemala	Upstream	10.0228	10.0228	10.0228	0.00336288	268985	0.000335522	0.000335522	0.000335522	NNN	37261.5	37261.5	37261.5	NNN
1065	47580	Mauritania	Middle stream	0.938869	0.939156	0.938869	0.109088	383798	0.116191	0.116155	0.116191	NNN	2446.26	2447.01	2446.26	NNN
1068	52220	Mali	Middle stream	16.5877	101.728	101.107	5.05778	1.13981e+07	0.304912	0.0497187	0.0500238	SNN	1455.3	8924.97	8870.53	NNN
1072	47434	Chad	Upstream	0.490044	0.490044	0.490044	5.68827e-06	1332.8	1.16077e-05	1.16077e-05	1.16077e-05	NNN	367679	367679	367679	NNN
1078	47580	Mali	Upstream	0.000286186	0.000286186	0.000286186	0.00272225	113409	9.51217	9.51217	9.51217	SSS	2.52348	2.52348	2.52348	SSS
1079	47593	Mali	Upstream	4.75757e-05	4.75757e-05	4.75757e-05	0.00285817	113884	60.0763	60.0763	60.0763	SSS	0.417755	0.417755	0.417755	SSS
1082	47812	Mali	Upstream	8.18572e-05	8.18572e-05	8.18572e-05	0.000424211	16563	5.18232	5.18232	5.18232	SSS	4.94217	4.94217	4.94217	SSS
1083	52220	Mali	Middle stream	0.129483	0.253509	0.25178	0.0048906	162923	0.0377703	0.0192917	0.0194241	NNN	794.747	1556	1545.39	SNN
1089	47238	Sudan	Upstream	0.199478	0.199478	0.199478	0.00182234	45711.9	0.00913554	0.00913554	0.00913554	NNN	4363.81	4363.81	4363.81	NNN
1090	47470	Eritrea	Middle stream	0.492114	1.22457	1.13523	0.161751	867111	0.328686	0.132088	0.142483	SNN	567.533	1412.24	1309.21	SNN
1092	50068	Shared zone	Middle stream	48.6792	334.212	323.654	1.26231	4.23397e+06	0.0259313	0.00377698	0.0039002	NNN	11497.3	78935.9	76442.1	NNN
1094	47781	Guatemala	Upstream	4.52478	4.52478	4.52478	0.204147	4.62907e+06	0.0451175	0.0451175	0.0451175	NNN	977.469	977.469	977.469	SSS
1095	47580	Mali	Middle stream	4.27896	20.3716	20.2051	0.208458	1.72655e+06	0.048717	0.0102328	0.0103171	NNN	2478.33	11799	11702.6	NNN
1097	52220	Burkina Faso	Middle stream	1.53073	3.46467	3.45465	0.065985	3.14421e+06	0.0431069	0.0190451	0.0191004	NNN	486.841	1101.92	1098.73	SNN
1098	38935	Eritrea	Upstream	0.0111835	0.0111835	0.0111835	0.00010695	78980.8	0.00956323	0.00956323	0.00956323	NNN	141.598	141.598	141.598	SSS
1099	47470	Eritrea	Upstream	0.106348	0.106348	0.106348	0.0350793	453981	0.329855	0.329855	0.329855	SSS	234.255	234.255	234.255	SSS
1100	48510	Eritrea	Upstream	2.66344	2.66344	2.66344	0.000471624	117521	0.000177073	0.000177073	0.000177073	NNN	22663.6	22663.6	22663.6	NNN
1102	50068	Lao PDR	Middle stream	25.656	370.866	359.031	0.121682	565005	0.00474285	0.000328103	0.000338919	NNN	45408.4	656394	635447	NNN
1104	48765	Honduras	Upstream	0.529244	0.529244	0.529244	0.0048785	194794	0.00921787	0.00921787	0.00921787	NNN	2716.94	2716.94	2716.94	NNN
1105	48194	Nicaragua	Upstream	7.3043	7.3043	7.3043	0.0333797	381834	0.00456987	0.00456987	0.00456987	NNN	19129.5	19129.5	19129.5	NNN
1107	47580	Mali	Middle stream	1.26574	4.61154	4.60393	0.00446069	192023	0.00352418	0.000967288	0.000968886	NNN	6591.58	24015.5	23975.9	NNN
1108	51703	Mali	Upstream	0.00138057	0.00138057	0.00138057	0.00624794	230486	4.52564	4.52564	4.52564	SSS	5.98981	5.98981	5.98981	SSS
1109	52220	Burkina Faso	Upstream	0.124026	0.124026	0.124026	0.00172843	198429	0.013936	0.013936	0.013936	NNN	625.04	625.04	625.04	SSS
1111	52220	Niger	Middle stream	0.955799	1.20218	0.955799	1.26361	6.04631e+06	1.32204	1.0511	1.32204	SSS	158.08	198.828	158.08	SSS
1113	48842	Niger	Middle stream	6.3378	11.3805	8.95849	0.00739704	786076	0.00116713	0.000649976	0.000825701	NNN	8062.58	14477.6	11396.5	NNN
1114	48842	Chad	Middle stream	26.0055	122.757	122.63	0.0739059	6.09459e+06	0.00284193	0.000602051	0.000602675	NNN	4266.99	20141.9	20121.1	NNN
1116	38935	Ethiopia	Upstream	137.324	137.324	137.324	1.22655	3.39364e+07	0.00893174	0.00893174	0.00893174	NNN	4046.52	4046.52	4046.52	NNN
1117	47470	Ethiopia	Middle stream	0.626108	0.732456	0.697377	0.0542601	1.51896e+06	0.0866625	0.0740797	0.077806	NNN	412.194	482.207	459.113	SSS
1121	50068	Vietnam	Upstream	34.6197	34.6197	34.6197	0.380231	2.04038e+06	0.0109831	0.0109831	0.0109831	NNN	16967.3	16967.3	16967.3	NNN
1122	48767	Honduras	Upstream	2.48994	2.48994	2.48994	0.0299075	552570	0.0120114	0.0120114	0.0120114	NNN	4506.1	4506.1	4506.1	NNN
1125	48779	Senegal	Middle stream	1.90012	9.43873	9.43616	0.0421541	1.41253e+06	0.0221849	0.00446608	0.00446729	NNN	1345.19	6682.16	6680.34	NNN
1141	52220	Nigeria	Upstream	0.246376	0.246376	0.246376	0.342272	5.42259e+06	1.38923	1.38923	1.38923	SSS	45.4352	45.4352	45.4352	SSS
1143	48842	Niger	Upstream	0.0645767	0.0645767	0.0645767	0.0443596	1.14316e+06	0.686929	0.686929	0.686929	SSS	56.4897	56.4897	56.4897	SSS
1144	48842	Nigeria	Middle stream	4.73855	4.80313	4.75877	2.37409	2.33599e+07	0.501016	0.49428	0.498887	SSS	202.85	205.614	203.715	SSS
1148	48842	Nigeria	Upstream	0.67581	0.67581	0.67581	0.308734	4.94228e+06	0.456836	0.456836	0.456836	SSS	136.741	136.741	136.741	SSS
1149	48842	Shared zone	Middle stream	0.787704	136.025	132.816	0.196725	1.13197e+06	0.249745	0.00144625	0.00148119	SNN	695.869	120166	117331	SNN
1153	49333	Senegal	Upstream	0.876065	0.876065	0.876065	0.00222119	222027	0.00253542	0.00253542	0.00253542	NNN	3945.77	3945.77	3945.77	NNN
1155	52220	Niger	Middle stream	1.69058	106.883	101.129	0.71929	6.33373e+06	0.42547	0.00672969	0.00711261	SNN	266.916	16875.2	15966.7	SNN
1161	48842	Sudan	Upstream	0.880121	0.880121	0.880121	0.0899328	1.1995e+06	0.102182	0.102182	0.102182	NNN	733.742	733.742	733.742	SSS
1163	49333	Guinea	Upstream	11.6253	11.6253	11.6253	0.0100693	559234	0.000866151	0.000866151	0.000866151	NNN	20787.9	20787.9	20787.9	NNN
1164	48779	Guinea	Upstream	7.53861	7.53861	7.53861	0.00257278	231627	0.000341281	0.000341281	0.000341281	NNN	32546.3	32546.3	32546.3	NNN
1166	47580	Guinea	Upstream	3.3458	3.3458	3.3458	0.00760697	90706.1	0.00227359	0.00227359	0.00227359	NNN	36886.2	36886.2	36886.2	NNN
1167	47580	Guinea	Upstream	15.1535	15.1535	15.1535	0.0570727	1.13722e+06	0.00376631	0.00376631	0.00376631	NNN	13325	13325	13325	NNN
1175	49081	Djibouti	Upstream	0.0262615	0.0262615	0.0262615	0.000518878	19706.6	0.0197581	0.0197581	0.0197581	NNN	1332.62	1332.62	1332.62	NNN
1178	52220	Burkina Faso	Upstream	0.0291546	0.0291546	0.0291546	0.0144229	353475	0.494704	0.494704	0.494704	SSS	82.48	82.48	82.48	SSS
1179	51703	Burkina Faso	Middle stream	0.992108	0.993488	0.992108	0.509459	5.42014e+06	0.513512	0.512798	0.513512	SSS	183.041	183.296	183.041	SSS
1183	52220	Benin	Upstream	1.62096	1.62096	1.62096	0.0080609	630515	0.00497292	0.00497292	0.00497292	NNN	2570.85	2570.85	2570.85	NNN
1184	52220	Shared zone	Middle stream	0.494131	108.998	102.517	0.035326	431455	0.0714912	0.000324097	0.000344588	NNN	1145.27	252629	237607	NNN
1185	48842	Cameroon	Upstream	0.423962	0.423962	0.423962	0.269826	1.23083e+06	0.636439	0.636439	0.636439	SSS	344.451	344.451	344.451	SSS
1187	38935	Sudan	Middle stream	0.984828	2.00397	1.97375	0.32114	7.39675e+06	0.326088	0.160252	0.162706	SNN	133.143	270.926	266.84	SSS
1188	38935	S. Sudan	Middle stream	44.0181	258.522	256.971	0.427737	9.34178e+06	0.00971731	0.00165455	0.00166453	NNN	4711.96	27673.7	27507.8	NNN
1191	50068	Cambodia	Middle stream	100.626	506.112	493.775	1.21715	1.2526e+07	0.0120957	0.00240489	0.00246498	NNN	8033.44	40405.1	39420.1	NNN
1192	49686	Nicaragua	Upstream	6.26856	6.26856	6.26856	0.384059	2.07881e+06	0.0612675	0.0612675	0.0612675	NNN	3015.46	3015.46	3015.46	NNN
1193	52220	Guinea	Upstream	75.4739	75.4739	75.4739	0.552205	2.14684e+06	0.00731651	0.00731651	0.00731651	NNN	35155.8	35155.8	35155.8	NNN
1197	51703	Burkina Faso	Upstream	0.346147	0.346147	0.346147	0.277305	7.0453e+06	0.801119	0.801119	0.801119	SSS	49.1316	49.1316	49.1316	SSS
1202	52220	Benin	Upstream	1.68043	1.68043	1.68043	0.00339993	317197	0.00202325	0.00202325	0.00202325	NNN	5297.75	5297.75	5297.75	NNN
1205	48842	Chad	Upstream	0.778798	0.778798	0.778798	0.000899817	125260	0.00115539	0.00115539	0.00115539	NNN	6217.44	6217.44	6217.44	NNN
1214	51875	Burkina Faso	Upstream	1.35756	1.35756	1.35756	0.126075	398354	0.0928686	0.0928686	0.0928686	NNN	3407.93	3407.93	3407.93	NNN
1216	51703	Togo	Upstream	3.97042	3.97042	3.97042	0.0445245	1.38198e+06	0.0112141	0.0112141	0.0112141	NNN	2872.99	2872.99	2872.99	NNN
1217	51703	Benin	Upstream	1.09121	1.09121	1.09121	0.00317373	197716	0.00290845	0.00290845	0.00290845	NNN	5519.07	5519.07	5519.07	NNN
1220	48842	Sudan	Upstream	0.0161801	0.0161801	0.0161801	0.0179356	341468	1.10849	1.10849	1.10849	SSS	47.384	47.384	47.384	SSS
1221	38935	Sudan	Upstream	1.00274	1.00274	1.00274	0.028629	703443	0.0285509	0.0285509	0.0285509	NNN	1425.47	1425.47	1425.47	NNN
1225	50050	N. Cyprus	Upstream	0.267538	0.267538	0.267538	0.000443195	145245	0.00165657	0.00165657	0.00165657	NNN	1841.97	1841.97	1841.97	NNN
1226	50064	Cambodia	Upstream	1.41481	1.41481	1.41481	0.161969	659110	0.114482	0.114482	0.114482	NNN	2146.54	2146.54	2146.54	NNN
1227	49686	Costa Rica	Upstream	11.867	11.867	11.867	0.284848	786584	0.0240033	0.0240033	0.0240033	NNN	15086.8	15086.8	15086.8	NNN
1229	50531	Guinea	Upstream	14.1666	14.1666	14.1666	0.0479779	515486	0.00338668	0.00338668	0.00338668	NNN	27482.1	27482.1	27482.1	NNN
1231	52220	CÃ´te d'Ivoire	Upstream	9.30536	9.30536	9.30536	0.0452032	553667	0.00485776	0.00485776	0.00485776	NNN	16806.8	16806.8	16806.8	NNN
1237	52220	Cameroon	Upstream	0.100821	0.100821	0.100821	0.00499785	309979	0.0495717	0.0495717	0.0495717	NNN	325.25	325.25	325.25	SSS
1242	38935	S. Sudan	Middle stream	0.0164079	1.01914	0.990514	0.00159604	37003.2	0.0972728	0.00156607	0.00161133	NNN	443.42	27542.1	26768.4	SNN
1249	51703	CÃ´te d'Ivoire	Upstream	1.22015	1.22015	1.22015	0.00376686	166546	0.00308721	0.00308721	0.00308721	NNN	7326.22	7326.22	7326.22	NNN
1250	51703	Shared zone	Middle stream	0.935423	8.21069	7.64838	0.0454959	1.22418e+06	0.0486367	0.00554106	0.00594843	NNN	764.12	6707.07	6247.74	SNN
1252	52220	Cameroon	Middle stream	43.5092	50.2919	50.2805	0.20298	3.5437e+06	0.00466522	0.00403604	0.00403696	NNN	12277.9	14191.9	14188.7	NNN
1253	52220	Chad	Middle stream	6.68189	6.78271	6.77771	0.00646497	1.15773e+06	0.000967536	0.000953154	0.000953857	NNN	5771.52	5858.6	5854.29	NNN
1260	38935	Ethiopia	Upstream	2.47689	2.47689	2.47689	0.00153352	236416	0.000619132	0.000619132	0.000619132	NNN	10476.8	10476.8	10476.8	NNN
1262	51703	Togo	Upstream	3.08477	3.08477	3.08477	0.00810509	374815	0.00262745	0.00262745	0.00262745	NNN	8230.11	8230.11	8230.11	NNN
1263	51516	Benin	Upstream	1.22989	1.22989	1.22989	0.00654067	355279	0.00531811	0.00531811	0.00531811	NNN	3461.75	3461.75	3461.75	NNN
1266	48842	Central African Rep.	Middle stream	32.914	32.9302	32.914	0.00226044	368715	6.8677e-05	6.86433e-05	6.8677e-05	NNN	89266.9	89310.8	89266.9	NNN
1268	52457	Ethiopia	Upstream	0.0770596	0.0770596	0.0770596	0.00385305	259846	0.0500009	0.0500009	0.0500009	NNN	296.559	296.559	296.559	SSS
1269	50302	Colombia	Upstream	13.9716	13.9716	13.9716	0.223828	1.04819e+06	0.0160202	0.0160202	0.0160202	NNN	13329.2	13329.2	13329.2	NNN
1271	51118	Guinea	Upstream	8.63207	8.63207	8.63207	0.00878809	506393	0.00101808	0.00101808	0.00101808	NNN	17046.2	17046.2	17046.2	NNN
1273	52051	Guinea	Upstream	2.68188	2.68188	2.68188	0.000989238	82968.4	0.00036886	0.00036886	0.00036886	NNN	32324.1	32324.1	32324.1	NNN
1278	48842	Shared zone	Middle stream	1.53771	35.2467	35.2274	0.00871924	98861.4	0.00567029	0.000247377	0.000247513	NNN	15554.2	356527	356331	NNN
1282	52457	N. Cyprus	Middle stream	1.18288	1.25994	1.25609	0.0303287	410649	0.0256396	0.0240715	0.0241453	NNN	2880.53	3068.18	3058.8	NNN
1283	50857	N. Cyprus	Upstream	2.70182	2.70182	2.70182	0.0200409	374906	0.00741755	0.00741755	0.00741755	NNN	7206.65	7206.65	7206.65	NNN
1284	51703	CÃ´te d'Ivoire	Upstream	0.372392	0.372392	0.372392	0.0189906	187369	0.0509962	0.0509962	0.0509962	NNN	1987.48	1987.48	1987.48	NNN
1288	38935	Shared zone	Middle stream	3.71006	58.0527	57.9547	0.00287478	120338	0.00077486	4.95202e-05	4.96039e-05	NNN	30830.3	482413	481598	NNN
1289	38935	Ethiopia	Upstream	46.8711	46.8711	46.8711	0.0578038	4.02607e+06	0.00123325	0.00123325	0.00123325	NNN	11641.9	11641.9	11641.9	NNN
1292	51489	Guinea	Upstream	11.7265	11.7265	11.7265	0.0033024	294006	0.000281619	0.000281619	0.000281619	NNN	39885.2	39885.2	39885.2	NNN
1293	52217	Guinea	Upstream	2.93867	2.93867	2.93867	0.0013316	117544	0.000453131	0.000453131	0.000453131	NNN	25000.7	25000.7	25000.7	NNN
1295	51516	Nigeria	Middle stream	2.50621	3.73609	3.72955	0.00507201	344705	0.00202378	0.00135757	0.00135995	NNN	7270.59	10838.5	10819.6	NNN
1296	48842	Cameroon	Upstream	13.7043	13.7043	13.7043	0.00316641	224496	0.000231052	0.000231052	0.000231052	NNN	61044.7	61044.7	61044.7	NNN
1297	48842	Central African Rep.	Upstream	46.9202	46.9202	46.9202	0.0059783	935481	0.000127414	0.000127414	0.000127414	NNN	50156.2	50156.2	50156.2	NNN
1300	52457	Ethiopia	Middle stream	0.462961	1.72291	1.68872	0.00374664	487244	0.00809277	0.0021746	0.00221862	NNN	950.162	3536.02	3465.87	SNN
1301	50529	Colombia	Upstream	29.0419	29.0419	29.0419	0.0644557	367793	0.00221941	0.00221941	0.00221941	NNN	78962.5	78962.5	78962.5	NNN
1302	51302	Venezuela	Upstream	16.6036	16.6036	16.6036	0.0456572	514397	0.00274984	0.00274984	0.00274984	NNN	32277.8	32277.8	32277.8	NNN
1303	51514	Togo	Upstream	7.94762	7.94762	7.94762	0.0374176	1.34542e+06	0.00470803	0.00470803	0.00470803	NNN	5907.16	5907.16	5907.16	NNN
1307	38935	S. Sudan	Upstream	7.47153	7.47153	7.47153	0.0401942	1.16726e+06	0.00537964	0.00537964	0.00537964	NNN	6400.91	6400.91	6400.91	NNN
1312	52217	CÃ´te d'Ivoire	Middle stream	6.30028	9.23895	9.23762	0.00804717	392370	0.00127727	0.000871005	0.000871131	NNN	16057	23546.6	23543.2	NNN
1313	51876	Ghana	Upstream	0.743395	0.743395	0.743395	0.0114974	535500	0.0154661	0.0154661	0.0154661	NNN	1388.23	1388.23	1388.23	NNN
1318	50529	Colombia	Middle stream	451.706	469.437	469.437	0.46077	1.57865e+06	0.00102007	0.000981538	0.000981538	NNN	286135	297367	297367	NNN
1319	50529	Shared zone	Middle stream	41.0678	698.887	698.425	0.0211676	166649	0.000515431	3.02876e-05	3.03076e-05	NNN	246434	4.19378e+06	4.19101e+06	NNN
1326	50529	Venezuela	Upstream	188.382	188.382	188.382	0.00102632	23822.6	5.44805e-06	5.44805e-06	5.44805e-06	NNN	7.90771e+06	7.90771e+06	7.90771e+06	NNN
1327	52217	Liberia	Upstream	7.91948	7.91948	7.91948	0.000323148	51877	4.08042e-05	4.08042e-05	4.08042e-05	NNN	152659	152659	152659	NNN
1328	52060	Cameroon	Upstream	26.1295	26.1295	26.1295	0.0141297	706056	0.000540758	0.000540758	0.000540758	NNN	37007.7	37007.7	37007.7	NNN
1329	56139	Central African Rep.	Upstream	175.735	175.735	175.735	0.0121067	1.54597e+06	6.88918e-05	6.88918e-05	6.88918e-05	NNN	113673	113673	113673	NNN
1344	53813	Ethiopia	Middle stream	55.9814	70.1871	69.9915	1.18173	1.18435e+07	0.0211093	0.0168369	0.0168839	NNN	4726.75	5926.19	5909.68	NNN
1347	53561	Guyana	Middle stream	12.7599	18.3252	18.3243	0.00100188	14032.6	7.85178e-05	5.46724e-05	5.4675e-05	NNN	909303	1.3059e+06	1.30584e+06	NNN
1348	51488	Suriname	Upstream	16.687	16.687	16.687	0.00020855	1861.89	1.24978e-05	1.24978e-05	1.24978e-05	NNN	8.9624e+06	8.9624e+06	8.9624e+06	NNN
1349	51679	Suriname	Upstream	29.6389	29.6389	29.6389	0.000266496	9998.73	8.99146e-06	8.99146e-06	8.99146e-06	NNN	2.96426e+06	2.96426e+06	2.96426e+06	NNN
1351	56139	Dem. Rep. Congo	Middle stream	924.139	1202.81	1201.92	0.270087	4.5928e+07	0.000292258	0.000224546	0.000224714	NNN	20121.5	26189.2	26169.7	NNN
1358	52594	Ethiopia	Upstream	54.2549	54.2549	54.2549	0.372351	1.03281e+07	0.006863	0.006863	0.006863	NNN	5253.12	5253.12	5253.12	NNN
1359	52481	Malaysia	Upstream	2.92287	2.92287	2.92287	0.0122989	25559.8	0.00420783	0.00420783	0.00420783	NNN	114354	114354	114354	NNN
1363	56139	Cameroon	Upstream	9.67478	9.67478	9.67478	0.00581982	261269	0.000601546	0.000601546	0.000601546	NNN	37029.9	37029.9	37029.9	NNN
1366	52596	Ethiopia	Upstream	0.688769	0.688769	0.688769	0.0006006	50781.3	0.00087199	0.00087199	0.00087199	NNN	13563.4	13563.4	13563.4	NNN
1368	53813	Ethiopia	Upstream	1.72319	1.72319	1.72319	0.00259838	292704	0.00150789	0.00150789	0.00150789	NNN	5887.14	5887.14	5887.14	NNN
1369	53813	Ethiopia	Upstream	14.0718	14.0718	14.0718	0.175514	3.01041e+06	0.0124728	0.0124728	0.0124728	NNN	4674.36	4674.36	4674.36	NNN
1375	51679	France	Upstream	18.1716	18.1716	18.1716	2.8052e-05	858.688	1.54373e-06	1.54373e-06	1.54373e-06	NNN	2.11621e+07	2.11621e+07	2.11621e+07	NNN
1378	38935	Uganda	Middle stream	6.63187	151.97	150.884	0.0106564	2.23165e+06	0.00160684	7.01214e-05	7.06262e-05	NNN	2971.73	68097.8	67611.1	NNN
1380	53813	Kenya	Middle stream	0.133932	14.2057	14.0302	0.0201053	244663	0.150115	0.0014153	0.001433	NNN	547.416	58062.2	57344.9	SNN
1381	50529	Venezuela	Upstream	17.7313	17.7313	17.7313	6.05886e-05	909.33	3.41704e-06	3.41704e-06	3.41704e-06	NNN	1.94993e+07	1.94993e+07	1.94993e+07	NNN
1383	51488	Guyana	Middle stream	14.0311	21.6165	21.6164	0.000120032	5863.11	8.55468e-06	5.55279e-06	5.55282e-06	NNN	2.39312e+06	3.68686e+06	3.68684e+06	NNN
1386	52215	France	Upstream	11.351	11.351	11.351	9.44886e-06	1661.76	8.32428e-07	8.32428e-07	8.32428e-07	NNN	6.8307e+06	6.8307e+06	6.8307e+06	NNN
1387	52215	Brazil	Upstream	4.41177	4.41177	4.41177	0.000219268	440.077	4.97006e-05	4.97006e-05	4.97006e-05	NNN	1.0025e+07	1.0025e+07	1.0025e+07	NNN
1388	56139	Central African Rep.	Middle stream	23.6785	33.3533	33.3475	0.00415743	680273	0.000175578	0.000124648	0.00012467	NNN	34807.4	49029.3	49020.8	NNN
1393	53813	Kenya	Middle stream	9.60253	11.3257	11.3231	0.175594	2.64756e+06	0.0182863	0.015504	0.0155076	NNN	3626.93	4277.79	4276.81	NNN
1395	53561	Colombia	Upstream	44.6783	44.6783	44.6783	0.000825013	5272.73	1.84656e-05	1.84656e-05	1.84656e-05	NNN	8.47347e+06	8.47347e+06	8.47347e+06	NNN
1396	53561	Venezuela	Upstream	61.7663	61.7663	61.7663	6.88809e-05	783.22	1.11519e-06	1.11519e-06	1.11519e-06	NNN	7.88621e+07	7.88621e+07	7.88621e+07	NNN
1397	53561	Brazil	Upstream	5.56524	5.56524	5.56524	0.000842645	5841.3	0.000151412	0.000151412	0.000151412	NNN	952740	952740	952740	NNN
1398	51488	Suriname	Upstream	7.58535	7.58535	7.58535	0.000128993	667.193	1.70055e-05	1.70055e-05	1.70055e-05	NNN	1.13691e+07	1.13691e+07	1.13691e+07	NNN
1402	56139	Cameroon	Upstream	0.855416	0.855416	0.855416	0.00018356	5877.09	0.000214585	0.000214585	0.000214585	NNN	145551	145551	145551	NNN
1403	56139	Congo	Middle stream	84.1649	147.419	147.398	0.00190352	466233	2.26165e-05	1.29123e-05	1.29141e-05	NNN	180521	316192	316146	NNN
1409	52863	Gabon	Upstream	15.8998	15.8998	15.8998	0.00238939	75837.7	0.000150279	0.000150279	0.000150279	NNN	209655	209655	209655	NNN
1410	56139	Cameroon	Middle stream	24.2261	25.4835	25.4834	0.0101851	299238	0.000420418	0.000399674	0.000399676	NNN	80959.4	85161.3	85160.9	NNN
1413	38935	Shared zone	Middle stream	6.72495	145.339	144.264	0.0117268	2.21607e+06	0.00174377	8.06861e-05	8.1287e-05	NNN	3034.63	65583.9	65099.1	NNN
1414	38935	Uganda	Middle stream	46.0735	118.428	117.695	0.263413	2.41033e+07	0.00571722	0.00222425	0.0022381	NNN	1911.5	4913.34	4882.93	NNN
1416	53561	Colombia	Middle stream	466.571	599.409	599.346	0.131032	766080	0.000280839	0.000218601	0.000218625	NNN	609038	782436	782354	NNN
1417	53561	Shared zone	Middle stream	64.1731	1588.33	1580.73	0.0358982	251759	0.000559396	2.26011e-05	2.27099e-05	NNN	254899	6.30894e+06	6.27874e+06	NNN
1420	54126	Gabon	Middle stream	12.9854	20.528	20.5278	0.000137214	8681.82	1.05668e-05	6.68425e-06	6.6843e-06	NNN	1.4957e+06	2.36448e+06	2.36446e+06	NNN
1421	54126	Congo	Upstream	7.54257	7.54257	7.54257	0.000156293	21574.3	2.07214e-05	2.07214e-05	2.07214e-05	NNN	349609	349609	349609	NNN
1423	56139	Congo	Upstream	1.25739	1.25739	1.25739	0.000110551	29077.3	8.79213e-05	8.79213e-05	8.79213e-05	NNN	43242.8	43242.8	43242.8	NNN
1424	56139	Congo	Middle stream	1.54147	27.025	27.0147	0.000142391	49060	9.23732e-05	5.26885e-06	5.27086e-06	NNN	31420.2	550856	550646	NNN
1425	56139	Shared zone	Middle stream	2.02052	63.2542	63.2336	0.000545712	151412	0.000270085	8.62728e-06	8.63009e-06	NNN	13344.5	417764	417628	NNN
1427	54126	Shared zone	Middle stream	17.379	37.907	37.9067	0.000268124	16141.7	1.5428e-05	7.0732e-06	7.07326e-06	NNN	1.07666e+06	2.3484e+06	2.34838e+06	NNN
1432	52971	Ecuador	Upstream	7.224	7.224	7.224	0.403293	941824	0.0558268	0.0558268	0.0558268	NNN	7670.22	7670.22	7670.22	NNN
1433	53561	Colombia	Upstream	39.6433	39.6433	39.6433	0.0171984	115070	0.000433828	0.000433828	0.000433828	NNN	344515	344515	344515	NNN
1435	53197	Gabon	Upstream	8.86658	8.86658	8.86658	0.000557	9228.42	6.28202e-05	6.28202e-05	6.28202e-05	NNN	960791	960791	960791	NNN
1436	38935	Dem. Rep. Congo	Middle stream	11.6627	20.186	20.1236	0.0156708	2.52018e+06	0.00134367	0.000776316	0.000778725	NNN	4627.73	8009.78	7985	NNN
1440	38935	Kenya	Upstream	23.0005	23.0005	23.0005	0.354637	1.2166e+07	0.0154186	0.0154186	0.0154186	NNN	1890.56	1890.56	1890.56	NNN
1442	53561	Ecuador	Upstream	164.107	164.107	164.107	1.21261	2.59381e+06	0.00738911	0.00738911	0.00738911	NNN	63269	63269	63269	NNN
1444	38935	Uganda	Upstream	8.52336	8.52336	8.52336	0.0624275	4.47654e+06	0.00732428	0.00732428	0.00732428	NNN	1904	1904	1904	NNN
1446	53999	Kenya	Upstream	0.0775477	0.0775477	0.0775477	0.00324565	24192.6	0.0418536	0.0418536	0.0418536	NNN	3205.43	3205.43	3205.43	NNN
1448	53561	Peru	Upstream	39.0403	39.0403	39.0403	0.00165272	10267	4.23336e-05	4.23336e-05	4.23336e-05	NNN	3.80251e+06	3.80251e+06	3.80251e+06	NNN
1454	53998	Kenya	Upstream	0.0671312	0.0671312	0.0671312	0.00027878	8903	0.00415277	0.00415277	0.00415277	NNN	7540.29	7540.29	7540.29	NNN
1461	38935	Rwanda	Upstream	9.7366	9.7366	9.7366	0.187807	8.82971e+06	0.0192887	0.0192887	0.0192887	NNN	1102.71	1102.71	1102.71	NNN
1462	38935	Shared zone	Middle stream	4.20492	19.973	19.7522	0.0138409	1.14031e+06	0.00329161	0.000692984	0.000700731	NNN	3687.52	17515.4	17321.7	NNN
1463	38935	Tanzania	Middle stream	22.1778	49.3536	49.0757	0.100514	7.16104e+06	0.0045322	0.00203661	0.00204814	NNN	3097	6891.96	6853.16	NNN
1466	38935	Kenya	Upstream	7.20285	7.20285	7.20285	0.0432047	2.02937e+06	0.00599827	0.00599827	0.00599827	NNN	3549.31	3549.31	3549.31	NNN
1476	54730	Gabon	Upstream	4.86603	4.86603	4.86603	0.00014616	9493.38	3.00367e-05	3.00367e-05	3.00367e-05	NNN	512571	512571	512571	NNN
1477	54126	Congo	Upstream	12.881	12.881	12.881	0.000190611	28166.2	1.47978e-05	1.47978e-05	1.47978e-05	NNN	457321	457321	457321	NNN
1480	54580	Tanzania	Upstream	2.17418	2.17418	2.17418	0.00227276	97689.1	0.00104534	0.00104534	0.00104534	NNN	22256.2	22256.2	22256.2	NNN
1484	53561	Shared zone	Middle stream	54.1538	132.837	132.819	0.0444395	214110	0.000820617	0.00033454	0.000334588	NNN	252925	620417	620329	NNN
1487	54730	Congo	Middle stream	2.90105	7.76709	7.76694	4.47196e-05	18838.1	1.5415e-05	5.75758e-06	5.75769e-06	NNN	153999	412306	412299	NNN
1490	38935	Burundi	Upstream	6.03145	6.03145	6.03145	0.0330097	4.21507e+06	0.00547293	0.00547293	0.00547293	NNN	1430.93	1430.93	1430.93	NNN
1492	55002	Tanzania	Upstream	1.14257	1.14257	1.14257	0.00144867	59184.5	0.00126791	0.00126791	0.00126791	NNN	19305.2	19305.2	19305.2	NNN
1494	53561	Peru	Middle stream	580.193	789.417	788.203	5.66842	9.10241e+06	0.00976988	0.00718051	0.00719158	NNN	63740.6	86726.1	86592.7	NNN
1497	54858	Ecuador	Upstream	2.4095	2.4095	2.4095	0.367968	115073	0.152715	0.152715	0.152715	NNN	20939	20939	20939	NNN
1500	55469	Ecuador	Downstream	4.909	6.71687	6.49229	0.911695	329176	0.185719	0.135732	0.140427	NNN	14913	20405.1	19722.8	NNN
1505	56139	Burundi	Upstream	1.59216	1.59216	1.59216	0.0128685	524818	0.00808242	0.00808242	0.00808242	NNN	3033.73	3033.73	3033.73	NNN
1506	55423	Tanzania	Upstream	1.50902	1.50902	1.50902	0.508523	308064	0.33699	0.33699	0.33699	SSS	4898.38	4898.38	4898.38	NNN
1507	55469	Peru	Upstream	1.80786	1.80786	1.80786	0.224576	61610	0.124222	0.124222	0.124222	NNN	29343.7	29343.7	29343.7	NNN
1508	53561	Brazil	Middle stream	30.0918	45.1161	45.1155	0.00118168	7610.51	3.92691e-05	2.61919e-05	2.61923e-05	NNN	3.95398e+06	5.92813e+06	5.92805e+06	NNN
1510	53561	Brazil	Middle stream	70.2808	78.0376	78.0353	0.0474036	222805	0.000674489	0.000607446	0.000607464	NNN	315436	350250	350240	NNN
1513	55750	Dem. Rep. Congo	Upstream	4.70627	4.70627	4.70627	0.00569789	1.06553e+06	0.0012107	0.0012107	0.0012107	NNN	4416.82	4416.82	4416.82	NNN
1514	56139	Shared zone	Middle stream	73.0585	1599.03	1597.83	0.0997237	1.15828e+07	0.00136498	6.23652e-05	6.24121e-05	NNN	6307.5	138052	137948	NNN
1517	56139	Tanzania	Upstream	44.479	44.479	44.479	0.344268	4.04677e+06	0.00774001	0.00774001	0.00774001	NNN	10991.2	10991.2	10991.2	NNN
1518	53561	Peru	Upstream	15.0243	15.0243	15.0243	0.000605365	3173.33	4.02924e-05	4.02924e-05	4.02924e-05	NNN	4.73455e+06	4.73455e+06	4.73455e+06	NNN
1523	56139	Shared zone	Middle stream	31.5182	128.184	127.806	0.254566	8.00605e+06	0.00807678	0.00198595	0.00199181	NNN	3936.8	16010.8	15963.7	NNN
1524	56139	Angola	Upstream	2.55704	2.55704	2.55704	0.0013479	155758	0.000527133	0.000527133	0.000527133	NNN	16416.8	16416.8	16416.8	NNN
1527	56139	Angola	Upstream	49.375	49.375	49.375	0.0111689	1.24552e+06	0.000226204	0.000226204	0.000226204	NNN	39642.1	39642.1	39642.1	NNN
1531	56139	Dem. Rep. Congo	Upstream	12.4992	12.4992	12.4992	0.00269541	426708	0.000215647	0.000215647	0.000215647	NNN	29292.1	29292.1	29292.1	NNN
1535	56139	Angola	Upstream	28.7863	28.7863	28.7863	0.00721984	828413	0.000250808	0.000250808	0.000250808	NNN	34748.7	34748.7	34748.7	NNN
1552	56139	Zambia	Upstream	9.30877	9.30877	9.30877	0.0100863	209877	0.00108353	0.00108353	0.00108353	NNN	44353.5	44353.5	44353.5	NNN
1554	57184	Papua New Guinea	Upstream	3.53302	3.53302	3.53302	9.76324e-05	17534.4	2.76342e-05	2.76342e-05	2.76342e-05	NNN	201491	201491	201491	NNN
1555	56139	Zambia	Middle stream	20.5697	101.116	100.938	0.0750574	1.06046e+06	0.00364892	0.000742286	0.000743595	NNN	19397.1	95351.9	95184	NNN
1559	56139	Dem. Rep. Congo	Middle stream	27.9941	80.5467	80.4439	0.075128	1.62021e+06	0.00268371	0.000932725	0.000933918	NNN	17278.1	49713.8	49650.3	NNN
1561	60520	Tanzania	Upstream	15.0232	15.0232	15.0232	0.0466612	656910	0.00310594	0.00310594	0.00310594	NNN	22869.5	22869.5	22869.5	NNN
1563	53561	Peru	Upstream	15.9102	15.9102	15.9102	0.000919021	10807.4	5.77629e-05	5.77629e-05	5.77629e-05	NNN	1.47216e+06	1.47216e+06	1.47216e+06	NNN
1570	53561	Bolivia	Upstream	7.75678	7.75678	7.75678	0.00230507	24324.7	0.000297168	0.000297168	0.000297168	NNN	318886	318886	318886	NNN
1576	53561	Bolivia	Middle stream	370.548	550.262	550.192	0.599778	5.30977e+06	0.00161862	0.00108998	0.00109012	NNN	69786.1	103632	103619	NNN
1581	57677	Tanzania	Upstream	15.8095	15.8095	15.8095	0.0207197	1.55468e+06	0.00131058	0.00131058	0.00131058	NNN	10168.9	10168.9	10168.9	NNN
1585	53561	Peru	Upstream	179.714	179.714	179.714	0.0703444	267674	0.000391424	0.000391424	0.000391424	NNN	671390	671390	671390	NNN
1588	60520	Malawi	Middle stream	24.0581	39.0813	39.0346	0.246314	7.60616e+06	0.0102383	0.00630262	0.00631015	NNN	3162.97	5138.11	5131.97	NNN
1597	56139	Zambia	Upstream	52.5527	52.5527	52.5527	0.102863	1.53893e+06	0.00195734	0.00195734	0.00195734	NNN	34148.9	34148.9	34148.9	NNN
1600	57677	Mozambique	Upstream	48.6294	48.6294	48.6294	0.0141708	743602	0.000291404	0.000291404	0.000291404	NNN	65397.1	65397.1	65397.1	NNN
1608	60520	Mozambique	Upstream	5.27256	5.27256	5.27256	0.00360679	286339	0.000684068	0.000684068	0.000684068	NNN	18413.7	18413.7	18413.7	NNN
1620	60520	Angola	Upstream	40.9327	40.9327	40.9327	0.00427549	447831	0.000104452	0.000104452	0.000104452	NNN	91402.2	91402.2	91402.2	NNN
1636	60520	Zambia	Upstream	36.4709	36.4709	36.4709	0.554763	2.92672e+06	0.0152111	0.0152111	0.0152111	NNN	12461.3	12461.3	12461.3	NNN
1638	60520	Shared zone	Middle stream	4.3075	48.6613	48.3648	0.0122631	605830	0.00284691	0.000252008	0.000253553	NNN	7110.08	80321.8	79832.2	NNN
1644	60520	Zambia	Middle stream	92.8765	133.809	133.805	1.25017	6.95231e+06	0.0134606	0.00934295	0.00934325	NNN	13359.1	19246.7	19246.1	NNN
1647	60588	Peru	Upstream	21.8335	21.8335	21.8335	0.152046	1.01435e+06	0.00696389	0.00696389	0.00696389	NNN	21524.7	21524.7	21524.7	NNN
1650	60520	Shared zone	Middle stream	3.91472	159.629	157.981	0.0575848	630271	0.0147098	0.000360743	0.000364504	NNN	6211.16	253270	250656	NNN
1652	60520	Angola	Upstream	7.69567	7.69567	7.69567	0.00124155	102147	0.000161331	0.000161331	0.000161331	NNN	75339.5	75339.5	75339.5	NNN
1654	60520	Zimbabwe	Upstream	13.8559	13.8559	13.8559	0.38779	2.497e+06	0.0279874	0.0279874	0.0279874	NNN	5549.02	5549.02	5549.02	NNN
1656	60520	Zimbabwe	Upstream	22.1105	22.1105	22.1105	0.854134	4.71858e+06	0.0386303	0.0386303	0.0386303	NNN	4685.83	4685.83	4685.83	NNN
1658	60520	Malawi	Middle stream	6.15673	54.8181	54.5092	0.426621	2.19389e+06	0.0692934	0.00778248	0.00782658	NNN	2806.31	24986.8	24846	NNN
1659	65481	Bolivia	Upstream	7.73628	7.73628	7.73628	0.000263002	13788	3.39959e-05	3.39959e-05	3.39959e-05	NNN	561089	561089	561089	NNN
1660	59927	Angola	Upstream	16.5478	16.5478	16.5478	0.0196652	2.12302e+06	0.00118838	0.00118838	0.00118838	NNN	7794.48	7794.48	7794.48	NNN
1661	60520	Zambia	Upstream	0.00781283	0.00781283	0.00781283	0.000796681	16060.4	0.101971	0.101971	0.101971	NNN	486.466	486.466	486.466	SSS
1669	65481	Brazil	Middle stream	113.106	120.843	120.842	0.422499	1.59293e+06	0.00373541	0.00349628	0.00349628	NNN	71005.2	75861.8	75861.7	NNN
1673	60480	Angola	Upstream	1.12114	1.12114	1.12114	0.00361171	382688	0.00322145	0.00322145	0.00322145	NNN	2929.65	2929.65	2929.65	NNN
1677	61205	Angola	Upstream	19.9093	19.9093	19.9093	0.0133426	750605	0.000670166	0.000670166	0.000670166	NNN	26524.4	26524.4	26524.4	NNN
1683	60520	Shared zone	Middle stream	0.206575	7.91006	7.90802	0.00163053	40865.4	0.00789317	0.000206134	0.000206187	NNN	5055.02	193564	193514	NNN
1696	59927	Namibia	Upstream	0.401234	0.401234	0.401234	0.000598467	11555.5	0.00149157	0.00149157	0.00149157	NNN	34722.2	34722.2	34722.2	NNN
1699	61205	Namibia	Upstream	0.32418	0.32418	0.32418	0.0130471	161840	0.0402466	0.0402466	0.0402466	NNN	2003.08	2003.08	2003.08	NNN
1700	60520	Angola	Upstream	0.10085	0.10085	0.10085	7.96241e-05	4268.78	0.000789531	0.000789531	0.000789531	NNN	23625	23625	23625	NNN
1701	60520	Namibia	Middle stream	0.00838182	7.91844	7.91478	0.00079457	17414.9	0.0947968	0.000100344	0.000100391	NNN	481.302	454694	454483	SNN
1709	61205	Shared zone	Middle stream	0.539011	20.7725	20.7461	0.0394601	144969	0.0732083	0.00189963	0.00190205	NNN	3718.11	143289	143107	NNN
1710	60520	Botswana	Upstream	0.0294196	0.0294196	0.0294196	0.00045305	7394.41	0.0153996	0.0153996	0.0153996	NNN	3978.63	3978.63	3978.63	NNN
1713	65481	Bolivia	Middle stream	3.27658	124.119	123.697	0.0039979	20729.6	0.00122014	3.22101e-05	3.23202e-05	NNN	158063	5.98754e+06	5.96715e+06	NNN
1714	61205	Namibia	Upstream	0.184809	0.184809	0.184809	0.00479349	75404.7	0.0259375	0.0259375	0.0259375	NNN	2450.89	2450.89	2450.89	NNN
1718	60783	Bolivia	Upstream	1.38666	1.38666	1.38666	5.19195e-05	3347.02	3.74421e-05	3.74421e-05	3.74421e-05	NNN	414296	414296	414296	NNN
1720	61205	Zimbabwe	Middle stream	0.169619	0.172066	0.170194	0.00520184	128639	0.0306679	0.0302316	0.0305642	NNN	1318.56	1337.59	1323.03	NNN
1721	60783	Paraguay	Middle stream	4.3221	5.70876	5.70871	3.90605e-06	1739.69	9.03738e-07	6.84219e-07	6.84226e-07	NNN	2.4844e+06	3.28147e+06	3.28144e+06	NNN
1722	65481	Brazil	Middle stream	68.5713	192.691	192.264	0.474889	865615	0.00692549	0.00246452	0.00246999	NNN	79216.8	222605	222112	NNN
1725	65481	Bolivia	Upstream	0.915766	0.915766	0.915766	0.00107521	20874.6	0.00117411	0.00117411	0.00117411	NNN	43869.9	43869.9	43869.9	NNN
1726	65481	Paraguay	Middle stream	22.0312	22.9469	22.9459	0.000941653	28481.5	4.27419e-05	4.10361e-05	4.1038e-05	NNN	773525	805678	805640	NNN
1729	61205	Botswana	Upstream	0.00244773	0.00244773	0.00244773	0.0018727	60473.1	0.765077	0.765077	0.765077	SSS	40.4764	40.4764	40.4764	SSS
1734	65481	Bolivia	Upstream	15.8048	15.8048	15.8048	0.515094	1.17429e+06	0.032591	0.032591	0.032591	NNN	13459	13459	13459	NNN
1739	62875	Zimbabwe	Upstream	0.443851	0.443851	0.443851	0.00182288	58816.7	0.00410696	0.00410696	0.00410696	NNN	7546.34	7546.34	7546.34	NNN
1740	61224	Zimbabwe	Upstream	24.0315	24.0315	24.0315	1.93922	3.3506e+06	0.0806948	0.0806948	0.0806948	NNN	7172.29	7172.29	7172.29	NNN
1741	65481	Bolivia	Upstream	4.25499	4.25499	4.25499	0.181497	303986	0.042655	0.042655	0.042655	NNN	13997.3	13997.3	13997.3	NNN
1746	62875	Botswana	Middle stream	1.95899	2.40284	2.40102	0.215005	294793	0.109753	0.0894794	0.0895474	NNN	6645.31	8150.95	8144.76	NNN
1747	62875	Zimbabwe	Middle stream	3.04276	5.4456	5.22877	0.0933667	1.17115e+06	0.0306849	0.0171453	0.0178563	NNN	2598.09	4649.79	4464.65	NNN
1750	62875	Zimbabwe	Upstream	1.46293	1.46293	1.46293	0.0515446	174770	0.0352338	0.0352338	0.0352338	NNN	8370.62	8370.62	8370.62	NNN
1753	65481	Shared zone	Middle stream	5.85341	221.491	220.587	0.00501808	36315.8	0.000857292	2.26559e-05	2.27488e-05	NNN	161181	6.09903e+06	6.07415e+06	NNN
1756	62875	Botswana	Upstream	2.62701	2.62701	2.62701	0.0875511	1.01846e+06	0.0333273	0.0333273	0.0333273	NNN	2579.39	2579.39	2579.39	NNN
1757	62875	Shared zone	Middle stream	2.21105	20.2946	18.197	0.152283	323409	0.0688735	0.00750362	0.00836856	NNN	6836.68	62751.9	56266.1	NNN
1759	62875	South Africa	Upstream	10.0109	10.0109	10.0109	1.69983	6.91553e+06	0.169798	0.169798	0.169798	NNN	1447.6	1447.6	1447.6	NNN
1763	65481	Paraguay	Middle stream	92.4423	313.933	313.025	0.360372	3.90098e+06	0.00389834	0.00114793	0.00115126	NNN	23697.2	80475.4	80242.5	NNN
1766	62875	South Africa	Upstream	14.6442	14.6442	14.6442	1.40383	4.41784e+06	0.0958625	0.0958625	0.0958625	NNN	3314.78	3314.78	3314.78	NNN
1767	65481	Brazil	Upstream	613.744	613.744	613.744	19.6423	5.63759e+07	0.0320041	0.0320041	0.0320041	NNN	10886.6	10886.6	10886.6	NNN
1779	63983	Namibia	Upstream	0.0404998	0.0404998	0.0404998	0.00491023	64803.5	0.121241	0.121241	0.121241	NNN	624.962	624.962	624.962	SSS
1782	63044	South Africa	Upstream	7.76523	7.76523	7.76523	0.452414	1.83228e+06	0.0582616	0.0582616	0.0582616	NNN	4238.02	4238.02	4238.02	NNN
1783	65481	Argentina	Middle stream	57.6753	61.9303	61.7488	3.63396	2.16206e+06	0.0630072	0.0586782	0.0588506	NNN	26676.1	28644.1	28560.1	NNN
1792	63983	Namibia	Upstream	1.38847	1.38847	1.38847	0.0216832	318875	0.0156167	0.0156167	0.0156167	NNN	4354.27	4354.27	4354.27	NNN
1793	63983	South Africa	Middle stream	0.526045	1.91451	1.89283	0.0609103	471170	0.115789	0.031815	0.0321795	NNN	1116.47	4063.32	4017.3	NNN
1800	63983	Namibia	Upstream	0.0680566	0.0680566	0.0680566	0.000436016	8613.36	0.00640668	0.00640668	0.00640668	NNN	7901.28	7901.28	7901.28	NNN
1802	63209	South Africa	Upstream	2.01404	2.01404	2.01404	0.0150928	158061	0.00749379	0.00749379	0.00749379	NNN	12742.2	12742.2	12742.2	NNN
1803	63209	Swaziland	Middle stream	2.94453	4.95856	4.94347	1.24841	828046	0.423975	0.251768	0.252536	SSS	3556	5988.27	5970.04	NNN
1809	65372	Brazil	Upstream	163.966	163.966	163.966	4.06598	3.8386e+06	0.0247977	0.0247977	0.0247977	NNN	42715	42715	42715	NNN
1811	63983	Botswana	Middle stream	0.133242	2.08825	2.00075	0.00824581	115138	0.0618862	0.00394866	0.00412136	NNN	1157.23	18137	17377	NNN
1814	65481	Shared zone	Middle stream	41.453	1046.86	1021.62	0.821603	4.537e+06	0.0198201	0.000784822	0.000804214	NNN	9136.65	230739	225176	NNN
1816	65372	Argentina	Upstream	25.753	25.753	25.753	0.444395	313320	0.0172561	0.0172561	0.0172561	NNN	82193.8	82193.8	82193.8	NNN
1818	63209	South Africa	Upstream	1.30896	1.30896	1.30896	0.030429	300663	0.0232467	0.0232467	0.0232467	NNN	4353.58	4353.58	4353.58	NNN
1819	63209	Swaziland	Middle stream	0.603072	1.91203	1.8816	0.038593	173438	0.0639941	0.0201843	0.0205107	NNN	3477.16	11024.3	10848.9	NNN
1820	63209	South Africa	Middle stream	0.107077	2.01911	1.95009	0.0510224	148044	0.476501	0.0252697	0.0261641	SNN	723.279	13638.6	13172.3	SNN
1824	63983	Namibia	Upstream	3.19268	3.19268	3.19268	0.0713691	82479.5	0.022354	0.022354	0.022354	NNN	38708.7	38708.7	38708.7	NNN
1832	63983	South Africa	Downstream	50.9684	53.1247	53.0285	4.08467	1.57467e+07	0.0801413	0.0768884	0.0770279	NNN	3236.77	3373.7	3367.6	NNN
1845	65372	Uruguay	Middle stream	70.3048	78.9619	78.6536	2.06016	429439	0.0293033	0.0260906	0.0261929	NNN	163713	183872	183154	NNN
1846	65372	Brazil	Upstream	8.65711	8.65711	8.65711	0.308346	353856	0.0356177	0.0356177	0.0356177	NNN	24465	24465	24465	NNN
1856	65020	Uruguay	Upstream	23.8666	23.8666	23.8666	1.74691	245466	0.0731947	0.0731947	0.0731947	NNN	97229.6	97229.6	97229.6	NNN
1862	66276	Argentina	Upstream	2.43633	2.43633	2.43633	0.0236831	10796.1	0.0097208	0.0097208	0.0097208	NNN	225667	225667	225667	NNN
1863	66381	Argentina	Upstream	9.04627	9.04627	9.04627	0.0257819	44683.1	0.00285001	0.00285001	0.00285001	NNN	202454	202454	202454	NNN
1864	66417	Argentina	Upstream	17.2999	17.2999	17.2999	0.00109261	6585.24	6.31573e-05	6.31573e-05	6.31573e-05	NNN	2.62707e+06	2.62707e+06	2.62707e+06	NNN
1866	66644	Chile	Upstream	4.66653	4.66653	4.66653	0.000373953	3564.16	8.01352e-05	8.01352e-05	8.01352e-05	NNN	1.30929e+06	1.30929e+06	1.30929e+06	NNN
1868	66648	Argentina	Upstream	1.38595	1.38595	1.38595	4.62673e-05	332.175	3.33832e-05	3.33832e-05	3.33832e-05	NNN	4.17234e+06	4.17234e+06	4.17234e+06	NNN
1870	66779	Chile	Upstream	5.35682	5.35682	5.35682	0.0045395	2745.91	0.000847425	0.000847425	0.000847425	NNN	1.95084e+06	1.95084e+06	1.95084e+06	NNN
1873	66834	Argentina	Upstream	0.20981	0.20981	0.20981	0.0153101	752.058	0.0729715	0.0729715	0.0729715	NNN	278981	278981	278981	NNN
1874	66847	Chile	Upstream	1.60863	1.60863	1.60863	0.00603348	2241.03	0.00375069	0.00375069	0.00375069	NNN	717810	717810	717810	NNN
4005	5780	Norway	Downstream	0.250787	4.68326	4.66622	0.00970484	2948.85	0.0386975	0.00207224	0.00207981	NNN	85045.6	1.58816e+06	1.58238e+06	NNN
4019	5822	Russia	Downstream	481.159	529.255	528.708	9.23397	6.82369e+06	0.0191911	0.0174471	0.0174651	NNN	70513	77561.4	77481.3	NNN
4118	6228	Shared zone	Downstream	0.456428	2.23605	2.16418	0.00113746	7013.6	0.00249208	0.000508689	0.000525583	NNN	65077.6	318816	308569	NNN
4175	6515	Canada	Downstream	0.611828	0.872088	0.872088	0	0	0	0	0	NNN	0	0	0	NNN
4260	6736	Russia	Downstream	2.70376	3.07686	3.0761	0.728582	587151	0.269469	0.236794	0.236853	SSS	4604.88	5240.32	5239.02	NNN
4717	9584	Russia	Downstream	393.769	449.288	437.865	22.7904	2.03422e+07	0.0578776	0.0507256	0.052049	NNN	19357.2	22086.5	21524.9	NNN
4888	10697	Shared zone	Downstream	2.28348	8.67882	8.63897	0.0413159	48338.3	0.0180934	0.00476055	0.00478251	NNN	47239.5	179543	178719	NNN
4946	11301	Russia	Downstream	1.90714	2.23505	2.22521	0.0658369	14458.4	0.0345212	0.0294566	0.0295868	NNN	131906	154585	153904	NNN
5195	13842	United States	Downstream	67.2151	109.711	109.631	0.125331	121707	0.00186463	0.00114237	0.00114321	NNN	552268	901437	900773	NNN
5523	16948	United States	Downstream	7.31969	8.94689	8.94689	0.000779515	12.6034	0.000106496	8.71269e-05	8.71269e-05	NNN	5.80771e+08	7.09879e+08	7.09879e+08	NNN
5547	17102	Russia	Downstream	27.3982	38.4723	38.1662	9.13321	6.56304e+06	0.333351	0.237397	0.239301	SSS	4174.62	5861.95	5815.32	NNN
5571	17387	United States	Downstream	6.19113	20.8239	20.8201	6.76639e-06	2.07319	1.09292e-06	3.24934e-07	3.24993e-07	NNN	2.98628e+09	1.00444e+10	1.00426e+10	NNN
5600	17542	Shared zone	Downstream	0.797124	7.92818	6.90238	0.230589	121115	0.289276	0.0290847	0.0334072	SNN	6581.52	65459.7	56990.1	NNN
5712	18251	United States	Downstream	3.44273	16.0939	16.0926	0.0189719	13057.6	0.0055107	0.00117882	0.00117892	NNN	263657	1.23253e+06	1.23243e+06	NNN
5764	18662	United States	Downstream	9.77967	15.3201	15.3201	7.89708e-06	12.6813	8.07499e-07	5.15472e-07	5.15472e-07	NNN	7.71191e+08	1.20809e+09	1.20809e+09	NNN
5784	18792	Sweden	Downstream	6.92111	9.04631	9.0039	0.515422	1.54963e+06	0.074471	0.0569759	0.0572443	NNN	4466.29	5837.71	5810.34	NNN
5818	19156	Canada	Downstream	154.251	186.733	185.825	11.3479	5.14434e+06	0.0735681	0.0607709	0.0610679	NNN	29984.5	36298.7	36122.2	NNN
5849	19230	Latvia	Downstream	6.21524	15.3231	14.4708	0.544154	1.21457e+06	0.0875516	0.035512	0.0376037	NNN	5117.22	12616	11914.3	NNN
5869	19492	United States	Downstream	2.50571	24.7985	24.785	1.26854e-06	7.3128	5.06259e-07	5.11537e-08	5.11816e-08	NNN	3.42646e+08	3.39111e+09	3.38926e+09	NNN
5894	19646	Latvia	Downstream	0.786346	2.18519	1.82973	0.0913849	221397	0.116215	0.0418202	0.0499444	NNN	3551.76	9870.01	8264.5	NNN
6024	20874	United Kingdom	Downstream	2.70391	4.41633	4.39846	0.0623313	187650	0.0230523	0.0141138	0.0141712	NNN	14409.3	23534.9	23439.7	NNN
6045	20903	Shared zone	Middle stream	1.51125	18.1088	11.953	0.265823	182919	0.175897	0.0146792	0.022239	NNN	8261.85	98999.1	65346.2	NNN
6078	21307	Ireland	Downstream	2.09227	5.0225	4.99388	0.00809513	16232.8	0.00386907	0.00161177	0.00162101	NNN	128891	309404	307642	NNN
6104	21341	Russia	Downstream	2.95745	4.00407	3.82308	0.97341	1.01267e+06	0.329139	0.243105	0.254614	SSS	2920.45	3953.98	3775.25	NNN
6164	21789	Poland	Downstream	45.7605	52.642	51.1113	9.22595	2.10874e+07	0.201614	0.175258	0.180507	SNN	2170.04	2496.37	2423.78	NNN
6221	22219	Germany	Downstream	39.6163	62.1422	59.768	14.4795	1.87313e+07	0.365494	0.233007	0.242263	SSS	2114.98	3317.55	3190.8	NNN
6223	22231	Poland	Middle stream	1.46878	36.6097	28.6567	0.511137	743540	0.348002	0.0139618	0.0178366	SNN	1975.38	49237	38540.8	NNN
6228	22353	Kazakhstan	Downstream	0.57281	2.68608	2.54026	0.0266874	15997.8	0.0465902	0.00993541	0.0105057	NNN	35805.7	167904	158789	NNN
6277	22816	Kazakhstan	Downstream	0.592579	2.08427	1.95866	0.0034985	13892.6	0.00590386	0.00167853	0.00178618	NNN	42654.4	150028	140986	NNN
6278	22944	Russia	Downstream	74.115	389.665	353.7	1.59466	1.2563e+06	0.021516	0.00409238	0.00450851	NNN	58994.8	310170	281541	NNN
6350	23596	Netherlands	Middle stream	4.18762	110.754	87.6997	2.29974	5.29874e+06	0.549176	0.0207643	0.0262229	SNN	790.304	20902	16551.1	SNN
6395	24055	Belgium	Middle stream	0.813101	19.2178	12.2295	0.00563987	82865	0.00693625	0.000293471	0.000461171	NNN	9812.37	231917	147583	NNN
6430	24506	Belgium	Downstream	7.06344	11.1808	9.41429	9.87521	8.46106e+06	1.39807	0.883229	1.04896	SSS	834.817	1321.44	1112.66	SNN
6512	25559	Mongolia	Downstream	1.67675	3.95972	3.94256	0.0780061	79989.1	0.0465221	0.0196999	0.0197857	NNN	20962.3	49503.3	49288.7	NNN
6513	25605	Russia	Downstream	0.189157	2.58809	2.56913	0.00340584	8960.95	0.0180053	0.00131597	0.00132568	NNN	21109.1	288819	286703	NNN
6590	26466	China	Downstream	0.844274	5.65843	5.59267	0.0855055	326014	0.101277	0.0151112	0.0152889	NNN	2589.69	17356.4	17154.7	NNN
6620	26765	Kazakhstan	Downstream	0.81621	2.23048	1.95463	0.0454906	80284.2	0.0557339	0.020395	0.0232732	NNN	10166.5	27782.3	24346.4	NNN
6712	28021	Russia	Middle stream	1.29745	2.93263	1.29745	0.388198	218281	0.2992	0.132372	0.2992	SNS	5943.96	13435.1	5943.96	NNN
6713	28022	Russia	Downstream	94.2254	113.34	105.146	13.6022	1.29143e+07	0.144358	0.120013	0.129365	NNN	7296.23	8776.3	8141.88	NNN
6716	28466	Kazakhstan	Middle stream	2.14916	19.573	15.5115	1.06424	649972	0.495187	0.0543727	0.0686097	SNN	3306.54	30113.6	23864.8	NNN
6719	28118	China	Downstream	0.698593	1.08417	1.08099	0.684436	136694	0.979735	0.631302	0.633157	SSS	5110.62	7931.31	7908.08	NNN
6727	28332	Canada	Downstream	132.015	382.904	323.714	10.2003	7.51542e+06	0.0772662	0.0266392	0.0315102	NNN	17565.8	50949.1	43073.3	NNN
6747	28427	Ukraine	Downstream	42.8773	92.1125	84.0511	21.4227	1.69596e+07	0.499627	0.232571	0.254876	SSS	2528.19	5431.28	4955.95	NNN
6755	28872	Kazakhstan	Downstream	0.0723307	0.109916	0.0859143	0.0123464	40854.9	0.170694	0.112326	0.143707	NNN	1770.43	2690.4	2102.91	NNN
6773	28646	United States	Downstream	131.694	172.679	171.876	19.2938	6.89967e+06	0.146505	0.111732	0.112254	NNN	19086.9	25027.1	24910.8	NNN
6786	28838	Ukraine	Middle stream	0.488295	21.0769	16.0617	0.431718	127801	0.884133	0.020483	0.0268787	SNN	3820.74	164920	125678	NNN
6802	28937	Kazakhstan	Downstream	1.6818	2.69721	1.6818	1.54437	155890	0.918281	0.572579	0.918281	SSS	10788.4	17302	10788.4	NNN
6830	29247	Ukraine	Downstream	1.31188	1.52818	1.31188	0.413126	171805	0.314911	0.270338	0.314911	SSS	7635.85	8894.85	7635.85	NNN
6844	29327	Kazakhstan	Downstream	23.0413	31.7619	26.3425	7.76784	3.41457e+06	0.337127	0.244565	0.294879	SSS	6747.94	9301.87	7714.73	NNN
6861	29574	Canada	Downstream	14.1389	40.2949	40.013	0.188565	265369	0.0133366	0.00467962	0.00471259	NNN	53280.2	151845	150783	NNN
6876	29646	Shared zone	Downstream	2.55324	290.58	229.03	1.35664	1.79522e+06	0.531341	0.00466875	0.00592344	SNN	1422.24	161863	127577	NNN
6889	29687	Kazakhstan	Downstream	1.528	1.76522	1.75183	0.0333215	42754.9	0.0218072	0.0188766	0.019021	NNN	35738.7	41287.1	40973.8	NNN
6890	29702	Kazakhstan	Middle stream	12.1759	129.463	14.5079	13.6941	2.2075e+06	1.12469	0.105776	0.943911	SNS	5515.69	58647	6572.07	NNN
6891	29714	Kazakhstan	Downstream	4.51958	16.2768	9.84222	1.89521	1.00423e+06	0.419333	0.116437	0.192559	SNN	4500.54	16208.2	9800.75	NNN
6960	30202	Mongolia	Middle stream	1.64357e-07	4.32203e-06	1.64357e-07	3.94559e-05	942.237	240.062	9.12901	240.062	SSS	0.174432	4.58699	0.174432	SSS
6992	30502	Kazakhstan	Downstream	2.28359	6.01335	4.62674	2.96113	542760	1.2967	0.492427	0.640004	SSS	4207.36	11079.2	8524.47	NNN
6993	30550	China	Downstream	0.3138	0.440106	0.44007	0.00142821	1119.01	0.00455134	0.00324515	0.00324542	NNN	280426	393299	393266	NNN
6999	30586	China	Downstream	4.80417e-07	7.25756e-07	4.80417e-07	4.76853e-05	746.061	99.2581	65.7042	99.2581	SSS	0.643938	0.972784	0.643938	SSS
7036	30932	China	Downstream	0.562586	0.85581	0.855782	0.0224156	16891.1	0.0398438	0.0261922	0.0261931	NNN	33306.6	50666.3	50664.7	NNN
7044	30966	China	Downstream	2.12126e-06	2.48841e-06	2.12126e-06	0.00444153	15711	2093.82	1784.89	2093.82	SSS	0.135018	0.158387	0.135018	SSS
7072	31160	France	Downstream	60.5319	67.9267	67.322	6.41079	9.17342e+06	0.105908	0.0943781	0.0952257	NNN	6598.62	7404.73	7338.82	NNN
7090	31228	Kazakhstan	Downstream	0.373202	0.598029	0.598024	9.55869e-05	8498.87	0.000256127	0.000159836	0.000159838	NNN	43911.9	70365.8	70365.1	NNN
7096	31335	Mongolia	Downstream	0.184305	0.252157	0.251641	0.000332587	2062.2	0.00180455	0.00131897	0.00132167	NNN	89373.1	122276	122026	NNN
7103	31383	Russia	Downstream	3.08966	4.45415	4.38003	1.07974	1.19203e+06	0.349471	0.242413	0.246516	SSS	2591.92	3736.61	3674.42	NNN
7147	31708	Mongolia	Downstream	0.0792441	0.108873	0.108432	1.72918e-05	730.412	0.00021821	0.000158826	0.000159472	NNN	108492	149056	148453	NNN
7185	32045	China	Downstream	0.357013	0.403658	0.403658	9.73668e-05	804.853	0.000272726	0.000241211	0.000241211	NNN	443576	501530	501530	NNN
7188	32049	China	Downstream	0.000952579	0.0970921	0.0970769	0.00998671	934.016	10.4839	0.102858	0.102874	SNN	1019.87	103951	103935	NNN
7191	32059	Mongolia	Downstream	0.159852	0.300168	0.299365	0.000193315	3727.53	0.00120933	0.000644021	0.000645749	NNN	42884.3	80527.4	80311.9	NNN
7195	32108	Shared zone	Downstream	2.94268	9.67336	9.28018	0.512157	1.22126e+06	0.174044	0.0529451	0.0551883	NNN	2409.54	7920.79	7598.84	NNN
7224	32263	Albania	Downstream	9.75076	22.0478	21.4392	0.532923	779286	0.0546546	0.0241713	0.0248575	NNN	12512.4	28292.3	27511.3	NNN
7235	32291	Georgia	Downstream	7.59295	16.05	15.7518	0.119614	417129	0.0157533	0.00745258	0.00759365	NNN	18202.9	38477.3	37762.5	NNN
7236	32305	Azerbaijan	Downstream	0.170778	3.69456	3.59891	0.078278	120893	0.458361	0.0211874	0.0217505	SNN	1412.63	30560.5	29769.3	NNN
7237	32322	Turkmenistan	Downstream	0.96394	1.53754	1.53751	8.21679	2.10198e+06	8.52417	5.34411	5.3442	SSS	458.586	731.472	731.459	SSS
7259	32581	Portugal	Downstream	10.2754	27.9192	24.4214	2.17845	2.66228e+06	0.212007	0.0780267	0.0892023	SNN	3859.61	10487	9173.11	NNN
7326	32984	Greece	Middle stream	0.880698	7.06172	5.93697	0.642065	1.17303e+06	0.729041	0.0909219	0.108147	SNN	750.791	6020.08	5061.24	SNN
7327	32986	Greece	Downstream	1.27301	3.0744	2.24075	0.558186	418822	0.438477	0.181559	0.249106	SNS	3039.5	7340.58	5350.13	NNN
7329	32988	Greece	Downstream	1.11987	1.54464	1.43499	0.490134	252212	0.43767	0.317313	0.341558	SSS	4440.2	6124.37	5689.64	NNN
7332	32991	Turkey	Middle stream	3.73324	10.4688	5.28599	1.86528	1.77276e+06	0.499641	0.178174	0.352872	SNS	2105.89	5905.4	2981.79	NNN
7351	33146	China	Downstream	0.166612	0.23648	0.236465	0.000175351	4385.32	0.00105245	0.000741502	0.000741549	NNN	37993.1	53925.5	53922	NNN
7404	33477	China	Downstream	21.2319	25.6199	25.6002	20.8522	9.65475e+06	0.982115	0.813904	0.814532	SSS	2199.11	2653.61	2651.56	NNN
7458	33895	Shared zone	Downstream	12.9586	28.8169	27.9969	2.36174	3.96239e+06	0.182252	0.0819567	0.0843572	NNN	3270.41	7272.6	7065.65	NNN
7492	34094	Azerbaijan	Downstream	11.1837	46.0058	33.7025	9.04049	4.99353e+06	0.808364	0.196507	0.268244	SNS	2239.63	9213.08	6749.23	NNN
7494	34103	Turkmenistan	Downstream	6.00579	16.1138	9.16336	20.7909	2.1614e+06	3.46181	1.29026	2.26891	SSS	2778.66	7455.25	4239.55	NNN
7519	34348	Portugal	Downstream	5.92288	15.8808	12.9208	3.83176	3.59589e+06	0.646943	0.241284	0.296558	SSS	1647.13	4416.37	3593.21	NNN
7666	35244	Korea	Downstream	23.2244	30.04	29.8024	9.30698	1.32192e+07	0.400742	0.309819	0.312289	SSS	1756.86	2272.45	2254.48	NNN
7681	35354	Portugal	Middle stream	0.736767	4.2874	0.736767	1.06326	345828	1.44315	0.247997	1.44315	SSS	2130.45	12397.5	2130.45	NNN
7691	35374	Tunisia	Downstream	5.10527	6.96662	6.78831	0.551384	1.57155e+06	0.108003	0.0791466	0.0812256	NNN	3248.55	4432.95	4319.49	NNN
7710	35444	Iran	Downstream	1.80021	6.73485	5.41213	3.56281	1.23964e+06	1.97911	0.52901	0.658301	SSS	1452.21	5432.93	4365.9	NNN
7832	36079	Turkey	Downstream	2.56927	8.64171	6.10723	1.03867	730453	0.404266	0.120193	0.170072	SNN	3517.37	11830.6	8360.89	NNN
8014	37360	Algeria	Downstream	10.3991	17.9729	17.7979	0.780782	5.14142e+06	0.0750817	0.0434423	0.0438693	NNN	2022.61	3495.7	3461.67	NNN
8068	37727	Afghanistan	Middle stream	0.831551	2.13415	1.03361	0.283729	127218	0.341205	0.132947	0.274503	SNS	6536.4	16775.5	8124.71	NNN
8070	37763	India	Downstream	0.209416	0.679964	0.679752	0.000149143	3177.22	0.000712186	0.00021934	0.000219408	NNN	65911.8	214012	213946	NNN
8106	37989	Syria	Downstream	0.309718	0.516158	0.513992	0.00584243	39691.5	0.0188637	0.0113191	0.0113668	NNN	7803.13	13004.2	12949.7	NNN
8129	38172	United States	Downstream	0.0618782	0.0961059	0.0618782	4.96448	3.19461e+06	80.2299	51.6564	80.2299	SSS	19.3696	30.0837	19.3696	SSS
8151	38322	Iraq	Downstream	1.16785	1.5236	1.50489	0.0454182	234597	0.0388905	0.0298098	0.0301804	NNN	4978.11	6494.54	6414.79	NNN
8153	38356	Afghanistan	Downstream	0.122753	0.454684	0.386475	0.000121265	6251.12	0.000987875	0.000266702	0.000313772	NNN	19637	72736.3	61824.8	NNN
8198	38801	Mexico	Middle stream	0.0853918	42.5189	30.3808	1.80294	594355	21.1137	0.0424031	0.0593446	SNN	143.671	71537.9	51115.5	SNN
8213	38935	Egypt	Middle stream	0.385335	410.175	394.827	34.3212	5.08867e+07	89.0683	0.0836744	0.0869271	SNN	7.57242	8060.56	7758.95	SNN
8231	39121	Mexico	Downstream	0.0329316	0.0781515	0.0652829	0.0331905	18038.5	1.00786	0.424694	0.50841	SSS	1825.63	4332.49	3619.09	NNN
8232	39133	Mexico	Downstream	1.43599	1.90353	1.83674	0.193606	130549	0.134824	0.101709	0.105407	NNN	10999.6	14580.9	14069.3	NNN
8256	39270	Israel	Downstream	0.830756	5.15271	3.29404	0.066585	335335	0.0801499	0.0129223	0.0202138	NNN	2477.4	15365.9	9823.14	NNN
8258	39322	Iran	Middle stream	0.517201	22.8895	10.0803	0.0832372	319491	0.160938	0.00363649	0.00825738	NNN	1618.83	71643.6	31551.3	NNN
8282	39609	Saudi Arabia	Downstream	0.62328	0.913041	0.884689	1.20834	1.1191e+06	1.93868	1.32343	1.36584	SSS	556.948	815.871	790.536	SSS
8308	39906	Libya	Downstream	14.4276	14.5602	14.5601	0.25133	113813	0.0174201	0.0172615	0.0172615	NNN	126766	127931	127931	NNN
8347	40246	Libya	Downstream	0.367794	0.809591	0.782349	0.000378484	2506.95	0.00102907	0.0004675	0.000483779	NNN	146709	322938	312072	NNN
8353	40293	Iraq	Middle stream	0.346262	7.2783	0.346262	0.292093	681724	0.843562	0.040132	0.843562	SNS	507.92	10676.3	507.92	SNS
8354	40294	Iraq	Downstream	29.6124	127.29	81.1679	74.9732	3.10967e+07	2.53182	0.588997	0.92368	SSS	952.267	4093.34	2610.18	SNN
8374	40485	United States	Downstream	1080.97	1082.4	1082.3	139.541	8.17254e+07	0.129088	0.128918	0.12893	NNN	13226.9	13244.4	13243.1	NNN
8380	40505	Algeria	Downstream	0.601188	2.18991	2.07252	0.000119292	23483.6	0.000198427	5.44734e-05	5.75588e-05	NNN	25600.3	93252.6	88253.8	NNN
8382	40565	Egypt	Downstream	0.0421586	0.177005	0.165356	0.0225293	19301.2	0.534394	0.127281	0.136247	SNN	2184.25	9170.67	8567.14	NNN
8385	40583	Saudi Arabia	Middle stream	0.000748139	0.0465492	0.02772	0.0134632	15297.1	17.9956	0.289225	0.485686	SSS	48.9072	3043.01	1812.11	SNN
8395	40639	Pakistan	Downstream	2.58261	2.70702	2.69943	0.872883	1.73365e+06	0.337985	0.322452	0.323358	SSS	1489.69	1561.45	1557.08	NNN
8413	40802	Morocco	Downstream	1.41364	7.15792	6.92633	0.047053	146376	0.0332851	0.00657356	0.00679335	NNN	9657.55	48900.8	47318.6	NNN
8453	41261	Pakistan	Downstream	3.48165	4.75476	4.36788	0.1254	595530	0.0360173	0.0263735	0.0287095	NNN	5846.3	7984.07	7334.44	NNN
8464	41387	Mexico	Downstream	5.98787	5.98828	5.98787	1.25563	556099	0.209695	0.209681	0.209695	SSS	10767.6	10768.4	10767.6	NNN
8477	41437	Algeria	Downstream	0.443066	0.828204	0.827698	0.0775676	1.2311e+06	0.17507	0.0936576	0.0937148	NNN	359.894	672.735	672.325	SSS
8479	41483	Libya	Downstream	0.691097	0.838319	0.830693	0.151227	270558	0.218821	0.180393	0.182049	SNN	2554.34	3098.49	3070.3	NNN
8497	41732	Morocco	Downstream	0.702433	1.12526	1.12519	0.349375	417530	0.497379	0.310484	0.310504	SSS	1682.36	2695.04	2694.87	NNN
8526	42045	Mauritania	Downstream	0.00263327	0.00762525	0.00761993	1.73847e-05	65.7488	0.00660194	0.00227989	0.00228148	NNN	40050.5	115975	115894	NNN
8527	42061	Algeria	Downstream	2.71185	3.88067	3.86606	0.207428	1.2325e+06	0.0764897	0.0534516	0.0536537	NNN	2200.28	3148.62	3136.77	NNN
8557	42388	Libya	Downstream	0.175914	0.220642	0.220642	0.149573	108389	0.850258	0.677897	0.677899	SSS	1622.99	2035.65	2035.65	NNN
8574	42615	Shared zone	Downstream	4.68252	38.2124	31.0942	6.3356	5.3758e+06	1.35303	0.1658	0.203755	SNS	871.037	7108.22	5784.11	SNN
8579	42621	Morocco	Downstream	0.4924	0.59496	0.59496	3.3115e-06	742.519	6.72523e-06	5.56593e-06	5.56593e-06	NNN	663148	801272	801272	NNN
8611	43005	Egypt	Downstream	0.0236986	0.0788319	0.0780839	0.140647	14704.5	5.9348	1.78414	1.80122	SSS	1611.66	5361.08	5310.21	NNN
8624	43053	Pakistan	Downstream	1.03125	1.58659	1.58386	0.191388	520949	0.185587	0.120628	0.120837	NNN	1979.57	3045.59	3040.33	NNN
8686	43609	United Arab Emirates	Middle stream	0.508762	20.3466	14.5148	0.0331082	8082.48	0.065076	0.00162721	0.00228099	NNN	62946.3	2.51737e+06	1.79584e+06	NNN
8690	43614	United Arab Emirates	Downstream	0.508628	0.73664	0.623793	0.831239	1.95534e+06	1.63427	1.12842	1.33256	SSS	260.123	376.733	319.02	SSS
8709	43769	Mauritania	Downstream	3.04153	4.40718	4.40701	0.00340587	20661.4	0.00111979	0.000772799	0.000772829	NNN	147209	213306	213297	NNN
8710	43773	Mauritania	Downstream	0.15216	0.285726	0.285697	2.00764e-05	31.4134	0.000131943	7.02646e-05	7.02717e-05	NNN	4.84378e+06	9.09568e+06	9.09476e+06	NNN
8718	43904	Pakistan	Downstream	78.0509	213.716	193.6	152.301	1.42275e+08	1.95131	0.712634	0.786682	SSS	548.594	1502.14	1360.75	SNN
8719	43905	Pakistan	Middle stream	4.27198	14.5339	4.27198	24.8705	1.5003e+07	5.82177	1.71121	5.82177	SSS	284.742	968.733	284.742	SSS
8738	44055	Mauritania	Downstream	0.101508	0.122122	0.122113	0.000224438	2957.73	0.00221105	0.00183782	0.00183795	NNN	34319.4	41289.1	41286.1	NNN
8768	44329	Mauritania	Downstream	0.0717459	0.167081	0.166959	0.0180458	87191	0.251524	0.108006	0.108085	SNN	822.859	1916.27	1914.87	SNN
8769	44346	Mali	Downstream	0.519567	0.617864	0.617765	5.14855e-05	3867.34	9.90931e-05	8.33282e-05	8.33415e-05	NNN	134347	159765	159739	NNN
8770	44348	Mali	Downstream	0.132745	0.196536	0.196506	1.88654e-06	312.916	1.42118e-05	9.59896e-06	9.60043e-06	NNN	424219	628079	627983	NNN
8772	44427	Egypt	Downstream	0.0373801	0.260108	0.258836	0.000185145	4350.41	0.00495304	0.000711803	0.000715299	NNN	8592.33	59789.3	59497	NNN
8781	44515	Bangladesh	Middle stream	115.92	1231.14	959.347	70.938	1.10239e+08	0.611957	0.0576198	0.0739441	SNN	1051.54	11167.9	8702.46	NNN
8783	44560	China	Downstream	260.372	263.813	263.755	24.972	1.00052e+08	0.0959087	0.0946579	0.0946786	NNN	2602.37	2636.76	2636.18	NNN
8813	44636	Mali	Downstream	0.127541	0.228056	0.228045	1.50864e-06	325.465	1.18286e-05	6.61522e-06	6.61554e-06	NNN	391875	700708	700674	NNN
8856	45035	Oman	Downstream	1.02189	1.62309	1.45191	0.00192382	11153.3	0.0018826	0.00118529	0.00132503	NNN	91622.4	145525	130178	NNN
8897	45193	Mali	Downstream	0.353809	1.58908	1.58905	5.90377e-05	872.973	0.000166863	3.71522e-05	3.71529e-05	NNN	405292	1.8203e+06	1.82027e+06	NNN
8898	45206	Mali	Downstream	0.233534	0.360882	0.358803	0.0071961	159868	0.0308139	0.0199403	0.0200559	NNN	1460.79	2257.38	2244.37	NNN
8935	45492	Niger	Downstream	0.55175	0.659104	0.659096	5.04388e-05	399.286	9.14161e-05	7.65263e-05	7.65272e-05	NNN	1.38184e+06	1.65071e+06	1.65069e+06	NNN
8970	45818	Saudi Arabia	Downstream	0.0944494	0.446405	0.445981	0	0	0	0	0	NNN	0	0	0	NNN
8976	45859	Myanmar	Downstream	32.153	54.1911	54.1686	0.0609637	883393	0.00189605	0.00112498	0.00112544	NNN	36397.2	61344.3	61318.8	NNN
8979	45887	Vietnam	Downstream	58.5906	100.633	97.8499	4.59794	1.60502e+07	0.0784758	0.0456902	0.0469897	NNN	3650.46	6269.9	6096.5	NNN
9009	45936	Mauritania	Downstream	0.144666	0.735014	0.734972	0.000111785	2618.17	0.000772713	0.000152086	0.000152095	NNN	55254.7	280736	280720	NNN
9014	46073	Oman	Downstream	0.661408	0.768558	0.768127	0.00843772	30695.8	0.0127572	0.0109786	0.0109848	NNN	21547.2	25037.9	25023.9	NNN
9022	46132	Vietnam	Downstream	8.03793	13.4792	13.3892	1.10711	3.45545e+06	0.137736	0.0821349	0.0826868	NNN	2326.16	3900.85	3874.82	NNN
9057	46400	Mexico	Downstream	42.9474	48.4992	48.4547	0.927693	4.19264e+06	0.0216007	0.019128	0.0191456	NNN	10243.5	11567.7	11557.1	NNN
9058	46401	Mexico	Downstream	11.7603	89.5618	89.4237	0.124435	203552	0.0105809	0.00138937	0.00139152	NNN	57775.3	439994	439316	NNN
9082	46617	Vietnam	Downstream	16.5552	20.7824	20.7748	1.38044	3.92215e+06	0.0833841	0.0664237	0.0664479	NNN	4220.95	5298.72	5296.79	NNN
9094	46656	Belize	Downstream	4.44942	5.60839	5.60537	0.234219	128407	0.0526403	0.0417622	0.0417847	NNN	34651	43676.7	43653.2	NNN
9123	46725	Niger	Downstream	0.135735	0.226033	0.226033	0.000184523	53481.2	0.00135944	0.000816354	0.000816354	NNN	2537.98	4226.4	4226.4	NNN
9124	46726	Niger	Downstream	0.140112	0.237479	0.237479	0	1.03233	0	0	0	NNN	1.35723e+08	2.30041e+08	2.30041e+08	NNN
9125	46727	Niger	Downstream	0.132968	0.162371	0.162371	3.94989e-19	42.7894	2.97056e-18	2.43263e-18	2.43263e-18	NNN	3.10749e+06	3.79465e+06	3.79465e+06	NNN
9126	46728	Niger	Downstream	1.52312	1.85844	1.83387	0.0451846	398652	0.0296658	0.0243132	0.0246389	NNN	3820.68	4661.81	4600.18	NNN
9128	46760	Chad	Downstream	0.541251	0.549588	0.549588	7.09345e-06	4488.28	1.31057e-05	1.29068e-05	1.29068e-05	NNN	120592	122450	122450	NNN
9130	46793	Sudan	Downstream	1.18588	3.54172	3.43972	0.0986162	631090	0.0831588	0.0278441	0.0286698	NNN	1879.1	5612.08	5450.45	NNN
9160	46949	Mali	Downstream	3.77242	5.22837	5.22836	0.00655859	147072	0.00173856	0.00125442	0.00125443	NNN	25650.1	35549.7	35549.6	NNN
9161	46962	Mali	Downstream	0.886253	0.923721	0.923556	0.00438849	297237	0.00495173	0.00475088	0.00475173	NNN	2981.64	3107.7	3107.14	NNN
9184	47238	Sudan	Downstream	10.4115	12.4173	12.4151	0.00451186	99755.8	0.000433352	0.000363351	0.000363416	NNN	104370	124477	124455	NNN
9211	47434	Chad	Downstream	10.6844	13.7328	13.7328	0.0280341	1.33618e+06	0.00262384	0.00204139	0.0020414	NNN	7996.22	10277.7	10277.7	NNN
9213	47470	Sudan	Downstream	0.457692	1.68226	1.43117	0.998077	1.84859e+06	2.18068	0.593295	0.697385	SSS	247.59	910.024	774.196	SSS
9241	47580	Shared zone	Downstream	1.11631	28.1224	27.5962	1.70871	1.21232e+06	1.53067	0.0607599	0.0619184	SNN	920.808	23197.2	22763.1	SNN
9242	47593	Mauritania	Downstream	2.2365	2.23654	2.2365	0.132653	712867	0.0593127	0.0593115	0.0593127	NNN	3137.33	3137.39	3137.33	NNN
9254	47738	Myanmar	Downstream	53.5534	164.458	162.922	0.935153	2.39918e+06	0.0174621	0.00568628	0.00573989	NNN	22321.5	68547.4	67907.2	NNN
9266	47781	Honduras	Downstream	4.54216	9.06694	8.86279	0.101615	993475	0.0223714	0.0112072	0.0114653	NNN	4571.99	9126.49	8921	NNN
9277	47812	Mauritania	Downstream	0.118153	0.118235	0.118153	0.00297434	58802.2	0.0251736	0.0251562	0.0251736	NNN	2009.33	2010.73	2009.33	NNN
9278	47814	Mauritania	Downstream	0.0568867	0.230861	0.230635	0.00229399	22975.7	0.0403256	0.00993669	0.00994641	NNN	2475.95	10048	10038.2	NNN
9289	47944	Myanmar	Downstream	332.762	377.597	376.688	16.5966	2.61588e+07	0.0498754	0.0439533	0.0440593	NNN	12720.8	14434.8	14400.1	NNN
9321	48194	Shared zone	Downstream	23.2184	30.5227	30.4893	0.0179284	331101	0.000772163	0.000587379	0.000588022	NNN	70124.8	92185.5	92084.7	NNN
9348	48510	Ethiopia	Downstream	10.3528	13.0162	13.0157	0.201082	1.57388e+06	0.019423	0.0154486	0.0154491	NNN	6577.87	8270.14	8269.84	NNN
9389	48765	El Salvador	Downstream	6.86428	7.39353	7.38865	0.315588	2.13011e+06	0.0459754	0.0426844	0.0427125	NNN	3222.5	3470.95	3468.66	NNN
9391	48767	El Salvador	Downstream	0.950178	3.44011	3.41021	0.0149085	175578	0.0156902	0.00433372	0.00437172	NNN	5411.71	19593.1	19422.7	NNN
9397	48779	Gambia	Downstream	3.43099	12.8697	12.825	0.083598	2.01493e+06	0.0243655	0.00649571	0.00651836	NNN	1702.79	6387.19	6364.99	NNN
9398	48842	Chad	Downstream	0.378929	136.404	132.998	0.0575199	430932	0.151796	0.000421688	0.000432487	NNN	879.326	316532	308629	SNN
9428	49081	Eritrea	Downstream	0.0271689	0.0534304	0.0529116	0.000573768	42268.2	0.0211185	0.0107386	0.0108439	NNN	642.775	1264.08	1251.81	SNN
9500	49333	Guinea-Bissau	Downstream	20.4787	32.9801	32.9678	0.0768577	1.01324e+06	0.00375305	0.00233043	0.00233129	NNN	20211	32549	32536.9	NNN
9569	49686	Shared zone	Downstream	18.4685	36.6041	35.9352	0.041332	175148	0.00223797	0.00112916	0.00115018	NNN	105445	208989	205170	NNN
9631	50050	Somalia	Downstream	0.213681	0.481219	0.480776	0.000198264	98904.3	0.000927852	0.000412004	0.000412384	NNN	2160.48	4865.5	4861.02	NNN
9639	50064	Vietnam	Downstream	3.11035	4.52516	4.36319	0.538839	353194	0.173241	0.119076	0.123497	NNN	8806.35	12812.1	12353.5	NNN
9640	50068	Vietnam	Downstream	16.1933	522.305	508.751	7.67853	1.28785e+07	0.474181	0.0147012	0.0150929	SNN	1257.39	40556.4	39503.9	NNN
9694	50302	Venezuela	Downstream	13.9226	27.8942	27.6704	0.267107	1.0902e+06	0.0191851	0.00957571	0.00965317	NNN	12770.6	25586.2	25380.9	NNN
9733	50529	Venezuela	Downstream	446.456	1174.38	1173.84	2.42666	8.2752e+06	0.00543539	0.00206633	0.00206729	NNN	53951.1	141916	141850	NNN
9735	50531	Sierra Leone	Downstream	28.5493	42.716	42.668	0.131525	1.1114e+06	0.00460692	0.00307905	0.00308251	NNN	25687.7	38434.3	38391.1	NNN
9765	50857	Somalia	Downstream	0.312381	3.0142	2.99416	0.000169993	79376.2	0.000544185	5.63974e-05	5.67749e-05	NNN	3935.44	37973.6	37721.1	NNN
9806	51118	Sierra Leone	Downstream	22.2313	30.8634	30.8546	0.0133797	1.42814e+06	0.000601842	0.000433515	0.000433638	NNN	15566.6	21610.9	21604.8	NNN
9824	51302	Guyana	Downstream	117.913	134.517	134.471	0.0210836	41649.6	0.000178807	0.000156736	0.000156789	NNN	2.83108e+06	3.22973e+06	3.22863e+06	NNN
9845	51488	Shared zone	Downstream	9.24371	47.5472	47.5467	0.321042	149306	0.0347308	0.00675206	0.00675213	NNN	61911.3	318456	318453	NNN
9846	51489	Liberia	Downstream	31.2118	42.9383	42.935	0.0268729	1.63802e+06	0.000860986	0.00062585	0.000625898	NNN	19054.6	26213.5	26211.5	NNN
9849	51514	Shared zone	Downstream	1.42727	9.37489	9.33747	0.0441469	1.1456e+06	0.030931	0.00470906	0.00472793	NNN	1245.87	8183.36	8150.7	NNN
9851	51516	Benin	Downstream	11.4254	15.1615	15.1499	0.0838663	4.26309e+06	0.00734034	0.00553153	0.00553577	NNN	2680.07	3556.45	3553.73	NNN
9879	51679	Shared zone	Downstream	15.4474	63.2578	63.2575	0.00492934	70040.4	0.000319105	7.79245e-05	7.79249e-05	NNN	220550	903162	903158	NNN
9884	51703	Ghana	Downstream	26.1339	38.1479	37.2357	0.493552	8.94896e+06	0.0188855	0.0129378	0.0132548	NNN	2920.33	4262.83	4160.9	NNN
9910	51875	CÃ´te d'Ivoire	Downstream	11.0378	12.3954	12.2693	0.177722	3.99313e+06	0.0161012	0.0143378	0.0144851	NNN	2764.19	3104.17	3072.6	NNN
9911	51876	CÃ´te d'Ivoire	Downstream	1.83506	2.57846	2.56696	0.0153062	586771	0.00834099	0.0059362	0.00596278	NNN	3127.39	4394.32	4374.72	NNN
9936	52051	CÃ´te d'Ivoire	Downstream	40.9257	43.6076	43.6066	0.132673	3.12535e+06	0.00324181	0.00304244	0.0030425	NNN	13094.8	13952.9	13952.6	NNN
9941	52060	Nigeria	Downstream	47.0506	73.1801	73.1659	0.227281	1.11558e+07	0.00483057	0.00310578	0.00310638	NNN	4217.59	6559.82	6558.56	NNN
9957	52215	Shared zone	Downstream	34.568	50.3307	50.3305	0.00250198	28782.3	7.23784e-05	4.97107e-05	4.97109e-05	NNN	1.20102e+06	1.74867e+06	1.74866e+06	NNN
9959	52217	Shared zone	Downstream	24.5281	41.6865	41.6768	0.0145926	400183	0.000594937	0.000350057	0.000350138	NNN	61292.2	104169	104144	NNN
9962	52220	Nigeria	Downstream	180.122	340.615	332.435	4.39653	5.98046e+07	0.0244085	0.0129076	0.0132252	NNN	3011.85	5695.46	5558.68	NNN
9984	52457	Somalia	Downstream	0.964505	2.68741	2.64948	0.00190091	901194	0.00197087	0.000707339	0.000717464	NNN	1070.25	2982.05	2939.97	NNN
9995	52481	Indonesia	Downstream	19.5986	22.5215	22.5092	0.00129676	55458.7	6.61659e-05	5.75788e-05	5.76102e-05	NNN	353391	406095	405873	NNN
10003	52594	Kenya	Downstream	17.3209	71.5758	71.2035	0.161231	2.16335e+06	0.00930846	0.00225259	0.00226437	NNN	8006.51	33085.7	32913.5	NNN
10004	52596	Kenya	Downstream	4.57117	5.25994	5.25934	0.00106424	69006.7	0.000232816	0.000202329	0.000202352	NNN	66242.4	76223.6	76214.9	NNN
10036	52863	Cameroon	Downstream	44.6635	60.5633	60.5609	0.010302	497231	0.000230657	0.000170102	0.000170109	NNN	89824.6	121801	121796	NNN
10050	52971	Colombia	Downstream	20.2044	27.4284	27.0251	0.0730684	401097	0.00361646	0.00266397	0.00270372	NNN	50372.7	68383.3	67377.9	NNN
10072	53197	Eq. Guinea	Downstream	25.7021	34.5687	34.5682	0.0078707	43974.2	0.000306228	0.000227683	0.000227687	NNN	584482	786113	786100	NNN
10124	53561	Brazil	Downstream	2920.32	5142.3	5134.47	1.505	8.28733e+06	0.000515354	0.00029267	0.000293117	NNN	352384	620502	619556	NNN
10158	53813	Somalia	Downstream	5.68865	87.2015	85.6459	3.21502	5.02464e+06	0.565165	0.0368689	0.0375385	SNN	1132.15	17354.8	17045.2	NNN
10187	53998	Somalia	Downstream	0.245593	0.312725	0.312446	3.66428e-05	23462.9	0.000149201	0.000117173	0.000117277	NNN	10467.3	13328.5	13316.6	NNN
10188	53999	Somalia	Downstream	0.166643	0.24419	0.240945	4.29504e-05	17637.9	0.000257739	0.000175889	0.000178258	NNN	9447.98	13844.6	13660.6	NNN
10220	54126	Gabon	Downstream	472.571	523.359	523.358	0.0440922	566774	9.33028e-05	8.42485e-05	8.42486e-05	NNN	833791	923399	923398	NNN
10293	54580	Kenya	Downstream	3.42288	5.59707	5.59479	0.0124311	515469	0.00363176	0.002221	0.0022219	NNN	6640.32	10858.2	10853.8	NNN
10340	54730	Gabon	Downstream	35.8026	43.5697	43.5695	0.00213574	93719.6	5.96532e-05	4.9019e-05	4.90192e-05	NNN	382018	464894	464892	NNN
10372	54858	Peru	Downstream	2.06196	4.47147	4.1035	1.46051	303270	0.708309	0.326628	0.355917	SSS	6799.1	14744.2	13530.8	NNN
10379	55002	Kenya	Downstream	11.4682	12.6108	12.6093	0.570365	9.0073e+06	0.0497346	0.0452285	0.0452337	NNN	1273.21	1400.06	1399.9	NNN
10463	55423	Kenya	Downstream	2.41408	3.92309	3.41457	0.0396341	1.60653e+06	0.0164179	0.0101028	0.0116074	NNN	1502.66	2441.96	2125.43	NNN
10487	55469	Peru	Middle stream	0.39409	7.11096	5.97469	0.638855	332167	1.62109	0.0898409	0.106927	SNN	1186.42	21407.8	17987	NNN
10513	55750	Angola	Downstream	1.87384	6.58011	6.57441	0.0018295	196773	0.000976339	0.000278035	0.000278276	NNN	9522.83	33440.1	33411.1	NNN
10569	56139	Dem. Rep. Congo	Downstream	12.182	1613.77	1612.46	0.11127	2.25045e+06	0.009134	6.89505e-05	6.90062e-05	NNN	5413.13	717087	716509	NNN
10763	57184	Indonesia	Downstream	5.52454	9.05756	9.05746	0.00595812	187177	0.00107848	0.000657806	0.000657813	NNN	29515.1	48390.4	48389.9	NNN
10828	57677	Shared zone	Downstream	16.2847	80.7237	80.6888	0.0281505	721754	0.00172864	0.000348727	0.000348878	NNN	22562.7	111844	111795	NNN
11095	59927	Shared zone	Downstream	0.526708	17.4758	17.4555	0.000301484	23233.4	0.000572392	1.72515e-05	1.72715e-05	NNN	22670.3	752184	751312	NNN
11148	60480	Namibia	Downstream	3.96636	5.0875	5.08389	0.0635201	925660	0.0160147	0.0124855	0.0124944	NNN	4284.9	5496.08	5492.18	NNN
11150	60520	Mozambique	Downstream	42.4466	315.475	311.625	0.350761	4.79101e+06	0.00826359	0.00111185	0.00112559	NNN	8859.63	65847.2	65043.8	NNN
11157	60588	Bolivia	Downstream	18.3828	40.2163	40.0643	0.351858	3.12927e+06	0.0191406	0.00874912	0.00878233	NNN	5874.48	12851.7	12803.1	NNN
11170	60783	Bolivia	Downstream	12.2421	17.9508	17.9508	0.0118292	150478	0.000966278	0.00065898	0.000658982	NNN	81354.5	119292	119292	NNN
11211	61205	Botswana	Downstream	2.71613	23.8455	23.7678	0.0352772	524496	0.012988	0.0014794	0.00148424	NNN	5178.56	45463.7	45315.5	NNN
11213	61224	Mozambique	Downstream	2.36171	26.3932	24.454	0.0015468	176721	0.000654946	5.86058e-05	6.32533e-05	NNN	13364.1	149350	138376	NNN
11368	62875	Mozambique	Downstream	4.62245	41.0241	37.3189	0.481792	1.4284e+06	0.104229	0.0117441	0.0129101	NNN	3236.12	28720.4	26126.4	NNN
11383	63044	Mozambique	Downstream	4.07808	11.8433	11.3909	0.0990688	2.01494e+06	0.024293	0.00836496	0.0086972	NNN	2023.92	5877.73	5653.2	NNN
11399	63209	Mozambique	Downstream	4.00379	10.9815	9.59792	0.0283296	914811	0.00707569	0.00257976	0.00295164	NNN	4376.63	12004.1	10491.7	NNN
11442	63983	Shared zone	Middle stream	0.263668	56.581	52.3288	0.0602561	21725.3	0.22853	0.00106495	0.00115149	SNN	12136.4	2.60438e+06	2.40865e+06	NNN
11512	65020	Brazil	Downstream	133.465	157.332	155.585	7.09597	8.57291e+06	0.0531671	0.0451019	0.0456083	NNN	15568.3	18352.2	18148.5	NNN
11558	65372	Shared zone	Downstream	44.2882	312.969	306.09	3.68731	1.4226e+06	0.0832572	0.0117817	0.0120465	NNN	31131.9	219998	215162	NNN
11584	65481	Argentina	Downstream	180.939	1227.8	1201.74	6.96978	8.85677e+06	0.0385199	0.00567662	0.00579973	NNN	20429.5	138629	135686	NNN
11819	66276	Chile	Downstream	14.5244	16.9608	16.9371	0.011956	24991.5	0.000823164	0.00070492	0.000705906	NNN	581175	678662	677714	NNN
11860	66381	Chile	Downstream	8.27261	17.3189	17.2931	0.00014042	1708.02	1.69741e-05	8.10792e-06	8.12001e-06	NNN	4.84339e+06	1.01397e+07	1.01246e+07	NNN
11878	66417	Chile	Downstream	23.8829	41.1828	41.1817	0.000551233	4229.13	2.30806e-05	1.3385e-05	1.33854e-05	NNN	5.64725e+06	9.73789e+06	9.73763e+06	NNN
11966	66644	Argentina	Downstream	4.12381	8.79033	8.78996	0.0348226	36549.7	0.00844429	0.00396147	0.00396164	NNN	112827	240504	240494	NNN
11970	66648	Chile	Downstream	5.95687	7.34282	7.34277	8.6191e-06	54.0622	1.44692e-06	1.17381e-06	1.17382e-06	NNN	1.10186e+08	1.35822e+08	1.35821e+08	NNN
12019	66779	Argentina	Downstream	1.24553	6.60235	6.59781	0.0244371	75766.1	0.0196199	0.00370127	0.00370382	NNN	16439.1	87141.1	87081.2	NNN
12064	66834	Chile	Downstream	0.224912	0.434722	0.419411	0.0110632	695.037	0.0491891	0.0254489	0.0263779	NNN	323597	625466	603438	NNN
12074	66847	Argentina	Downstream	1.10826	2.71689	2.71085	0.0298016	54147.1	0.0268905	0.010969	0.0109934	NNN	20467.5	50176.1	50064.6	NNN
