# Supplementary material for: How downstream sub-basins depend on upstream inflows to avoid scarcity: typology and global analysis of transboundary rivers
Source: Copernicus journal article supplement (doi:10.5194/hess-22-2795-2018), 2018-05-08
Supplement: Supplementary file [file hess-22-2795-2018-supplement-title-page.pdf › hess-22-2795-2018-supplement-title-page.pdf]

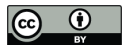

## *Supplement of*

# **How downstream sub-basins depend on upstream inflows to avoid scarcity: typology and global analysis of transboundary rivers**

**Hafsa Ahmed Munia et al.**

*Correspondence to:* Hafsa Ahmed Munia ([hafsa.munia@aalto.fi](mailto:hafsa.munia@aalto.fi)) and Matti Kummu ([matti.kummu@aalto.fi](mailto:matti.kummu@aalto.fi))

- [hess-22-2795-2018-supplement-title-page.pdf](#)
- [SBA\\_shp.zip](#)
- [supplementary\\_hess-2017-537.xlsx](#)

The copyright of individual parts of the supplement might differ from the CC BY 4.0 License.
